1 **Endothelial Protein C Receptor Contributes to Experimental Malaria-Associated**  
2 **Acute Respiratory Distress Syndrome**

3  
4 Luana dos Santos Ortolan<sup>1,4</sup>, Michelle Klein Sercundes<sup>2</sup>, Gabriel Candido Moura<sup>2</sup>,  
5 Thatyane de Castro Quirino<sup>2</sup>, Daniela Debone<sup>2</sup>, Douglas de Sousa Costa<sup>3</sup>, Oscar  
6 Murillo<sup>3</sup>, Claudio Romero Farias Marinho<sup>3</sup>, Sabrina Epiphanyo<sup>1,2</sup>

7 <sup>1</sup> Department of Immunology, Biomedical Science Institute, University of São Paulo  
8 (USP), 1730 Professor Lineu Prestes avenue, 05508-900, São Paulo, Brazil.

9 <sup>2</sup> Department of Clinical and Toxicological analyses, Faculty of Pharmaceutical Science,  
10 University of São Paulo (USP), 580 Professor Lineu Prestes avenue, 05508-000, São  
11 Paulo, Brazil São Paulo, Brazil.

12 <sup>3</sup> Department of Parasitology, Biomedical Science Institute, University of São Paulo  
13 (USP), 1374 Professor Lineu Prestes avenue, 05508-000, São Paulo, Brazil São Paulo,  
14 Brazil.

15 <sup>4</sup> Present address: Department of Dermatology, Carver College of Medicine, University  
16 of Iowa, 500 Newton Road, 2110 Medical Laboratories, 52242, Iowa City, IA, United  
17 States

18 Correspondence should be addressed to Sabrina Epiphanyo; [sabrinae@usp.br](mailto:sabrinae@usp.br)

19 **Abstract**

20 The severity of *Plasmodium falciparum* malaria is associated with parasite  
21 cytoadherence, but there is limited knowledge about the effect of parasite cytoadherence  
22 in malaria-associated acute respiratory distress syndrome (ARDS). Our objective was to  
23 evaluate the cytoadherence of infected red blood cells (iRBCs) in a murine model of  
24 ARDS and to appraise the role of endothelial protein C receptor (EPCR) in ARDS  
25 pathogenesis.

26 DBA/2 mice infected with *P. berghei* ANKA were classified as ARDS- or  
27 hyperparasitemia (HP)-developing mice according to respiratory parameters and  
28 parasitemia. Lungs, blood and bronchoalveolar lavage were collected for gene  
29 expression or protein analyses. Primary cultures of microvascular lung endothelial cells  
30 from DBA/2 mice were analyzed for iRBC interactions.

31 Lungs from ARDS-developing mice showed evidence of iRBC accumulation along  
32 with an increase in EPCR and TNF concentrations. Furthermore, TNF increased iRBC  
33 adherence *in vitro*. Dexamethasone-treated infected mice showed low levels of TNF and  
34 EPCR mRNA expression and, finally, decreased vascular permeability, thus protecting  
35 mice from ARDS.

36 In conclusion, we identified that increased iRBC cytoadherence in the lungs underlies  
37 malaria-associated ARDS in DBA/2-infected mice and that inflammation increased  
38 cytoadherence capacity through EPCR expression, suggesting a potential target for drug  
39 development.

40 **Keywords:** malaria; endothelial cells; cytoadherence; endothelial protein C receptor

41 **INTRODUCTION**

42 Malaria infection by *Plasmodium falciparum* is responsible for the largest number of  
43 severe and fatal diseases in the tropics [1,2]. The main complications of *P. falciparum*

44 infection include cerebral malaria, pulmonary complications, acute renal failure, severe  
45 anemia, bleeding and placental malaria [3]. An important aspect of the pathogenesis of  
46 severe malaria results from the ability of infected red blood cells (iRBCs) to adhere to  
47 the microvasculature. This interaction between iRBCs and the endothelium can cause  
48 blocking of blood flow and/or a local inflammatory response [3–5]. Furthermore, these  
49 adhesions promote the disappearance of asexual forms of the parasite in the peripheral  
50 circulation, thus preventing them from being destroyed in the spleen [3,5,6]. Pulmonary  
51 complications caused by severe malaria include acute respiratory distress syndrome  
52 (ARDS), which has been associated with not only severe malaria but also different  
53 diseases [7–9]. Although malaria-associated ARDS often causes a high mortality rate,  
54 little research has been performed. Murine models have been used to study malaria-  
55 associated ARDS [10,11], and DBA/2 mice infected with *P. berghei* ANKA (PbA)  
56 develop ARDS and die between the 7<sup>th</sup> to 12<sup>th</sup> days post-infection (dpi) with pleural  
57 effusion, edema and inflammatory infiltration in the lungs but without signals of  
58 cerebral malaria. In contrast, mice that died after the 13<sup>th</sup> dpi exhibited pale lungs, no  
59 pleural effusion and high levels of parasitemia. The cause of death was attributed to  
60 hyperparasitemia (HP) and consequent anemia. In addition, we established predictive  
61 criteria to distinguish which mice would die from ARDS on the 7<sup>th</sup> dpi using respiratory  
62 and parasitemia data [12]. Using this model, we found that on average 50% of the mice  
63 died from ARDS and 50% died from HP. We found that recruitment of neutrophils and  
64 vascular endothelial growth factor (VEGF) is essential to the pathogenesis of malaria-  
65 associated ARDS [13,14] and that the induction of heme oxygenase-1 (HO-1) has a  
66 protective effect against the development of ARDS in mice [15].  
67 Additionally, it has already been demonstrated that PbA-iRBCs adhere to MVECS  
68 (microvascular lung endothelial cells from CBA/Ca mice) and that TNF-stimulated cells  
69 express more ICAM-1 and VCAM than control cells [16]. In the *P. chabaudi* model,  
70 infected mice in the absence of ICAM-1 showed less anemia and weight loss, reduced  
71 parasite accumulation in both the spleen and liver and higher peripheral blood  
72 parasitemia during acute stage malaria, which presented the possible role of ICAM-1 in  
73 adhesion and pathogenesis of *P. chabaudi* [17]. Endothelial receptors have been studied  
74 to understand iRBC adherence in the microvasculature of different organs in severe  
75 malaria, and some of these receptors are well established such as ICAM-1 in cerebral  
76 malaria and CSA in placental malaria [18]. However, both the mechanism and  
77 consequences of PbA-iRBC adhesion in DBA/2 lung endothelial cells remain unknown.  
78 In 2013, endothelial protein C receptor (EPCR) was shown to be a new receptor for  
79 *Plasmodium falciparum* erythrocyte protein 1 (PfEMP1) in *P. falciparum*-induced  
80 severe malaria [19], which may result in a new branch of research on severe malaria. As  
81 its primary function, EPCR binds with activated protein C (APC) and cleaves protease-  
82 activated receptor 1 (PAR-1) in a specific Ras-related C3 botulinum toxin substrate 1  
83 (RAC1) pathway, which inhibits the activation of nuclear factor- $\kappa$ B and provides barrier  
84 protection [20]. The EPCR facilitates the activation of protein C (PC) by the thrombin-  
85 thrombomodulin complex, promoting cytoprotective effects in vessels and tissue  
86 protection in the brain, lungs, kidneys, and liver [21]. Additionally, APC provides  
87 neuroprotective effects such as anti-inflammatory and anti-apoptotic effects and  
88 protection of the blood-brain barrier, kidneys, and lungs and thus may be directly  
89 relevant to the complications associated with severe malaria [22].  
90 Some authors proposed that in malaria, *P. falciparum*-infected erythrocytes prompt a  
91 decrease in EPCR levels, and, consequently, APC production is disabled, resulting in  
92 enhanced coagulation and inducing proinflammatory factors and endothelial  
93 dysfunction via PAR-1 [23]. Indeed, *in vitro* studies show that purified amino-terminal

94 cysteine-rich interdomain region (CIDR $\alpha$ 1), especially that from domain cassette 8  
95 (DC8), member of the group containing PfEMP1, interferes with protein C binding to  
96 EPCR, resulting in acquired functional PC systemic deficiency [19,22,24]. However, it  
97 has unexpectedly been shown that iRBCs expressing DC13 and the HB3var03 or  
98 IT4var07 variants of PfEMP1 do not bind to the EPCR of brain endothelial cells *in*  
99 *vitro*. On the other hand, it has been shown that the DC8 variant IT4var19 may bind to  
100 the EPCR, but this interaction was inhibited when human serum or plasma was added to  
101 the assay [24]. Therefore, the disagreement concerning PfEMP1-EPCR interactions  
102 indicates the need for further studies to understand the outcome of severe malaria.  
103 Notwithstanding, there is no evidence to date of *P. berghei* ANKA binding to EPCR,  
104 and the effects of EPCR on ARDS pathogenesis must be elucidated. Our study,  
105 therefore, was developed in a murine model that mimics various types of human ARDS  
106 [12] and in primary culture of microvascular lung endothelial cells from DBA/2 mice  
107 (PMLEC) not only to clarify the adhesion of infected erythrocytes to murine lung  
108 microvascular endothelial cells but also to understand the relevant aspects of EPCR  
109 modulation by the immune response, which can bring important contributions to  
110 understanding malaria-associated ARDS.

## 111 MATERIALS AND METHODS

### 112 Experimental outline

113 DBA/2 mice were infected with  $10^6$  infected red blood cells (iRBC) infected with  
114 *Plasmodium berghei* ANKA (PbA) and classified as ARDS-developing or HP-  
115 developing mice before death according to previously described criteria [12]. Briefly,  
116 we used two groups of infected mice: the survival group (infected control) and the  
117 euthanized group, in which the mice were euthanized on the 7<sup>th</sup> day postinfection (10–  
118 12 mice per group). By using respiratory patterns (enhanced pause and respiratory  
119 frequency) and the degree of parasitemia as predictive criteria, we established cut-off  
120 values using receiver operating characteristic (ROC) curves for these parameters  
121 measured on the 7<sup>th</sup> dpi based on data from mice whose cause of death was known  
122 (survival group). In the survival group, for mice showing pleural effusion or red and  
123 congested lungs at necropsy, the cause of death was designated as ARDS. For mice  
124 without pleural effusion that died after 13 days postinfection with pale lungs and high  
125 levels of parasitemia, the cause of death was designated as hyperparasitemia (HP).  
126 Afterward, we retrospectively diagnosed the euthanized mice as suffering from ARDS  
127 or HP by comparing their respiratory patterns and parasitemia measured on the 7<sup>th</sup> dpi  
128 with the cut-off values from the survival group at the end of each experiment (20<sup>th</sup> dpi)  
129 [14,15]. All lung tissue, blood, and BAL samples were collected from mice on the 7<sup>th</sup>  
130 day postinfection (dpi) always after perfusion of the right ventricle with 20 mL of 1 $\times$   
131 PBS until the lungs remained clear.

### 132 Mice, parasites and euthanasia

133 Male DBA/2 mice between 6-10 weeks old (purchased from the Department of  
134 Parasitology, University of São Paulo, Brazil) were infected with  $1 \times 10^6$  *P. berghei*  
135 ANKA (clone 1.49L) iRBCs kindly provided by the laboratory of Dr. Maria Mota from  
136 the Institute of Molecular Medicine (IMM) in Portugal. Parasitemia and mortality were  
137 monitored daily. Parasitemia was determined by Giemsa staining and expressed as the

138 percentage of infected red blood cells. The euthanasia of mice was performed using  
139 ketamine (150 mg/kg)/xylazine (15 mg/kg).

#### 140 **Determination of Respiratory Pattern**

141 Respiratory patterns (respiratory frequency [RF], tidal volume [TV] and enhanced pause  
142 [Penh]) were monitored on the 7<sup>th</sup> dpi by an unrestrained whole-body plethysmography  
143 chamber (WBP, Buxco Electronics, USA) for 10 minutes (basal level) according to  
144 previously described methods [12].

#### 145 **Histopathological analyses and hemozoin count**

146 Lung tissue fragments were fixed with 10% buffered formalin for 24 hours and kept in  
147 70% ethanol until being embedded in paraffin, and 4–5 µm sections were stained with  
148 hematoxylin-eosin (H&E). To determine the hemozoin (Hz)-containing area, lungs from  
149 euthanized mice (ARDS-developing or HP-developing mice according to the predictive  
150 model on the 7<sup>th</sup> day postinfection [12]) were stained with H&E, and 10 images were  
151 captured from each tissue sample with polarized light (400× magnification) using a  
152 Zeiss color camera (CAM Axio HRC) connected to a Zeiss light microscope (Axio  
153 Imager.M2). The corresponding percentage of Hz in each image was identified using  
154 the program ImageJ, in which the areas containing Hz were distinguished by brightness  
155 adjustment. The area containing Hz was normalized by the total area in each image.

#### 156 **Quantification of gene expression**

157 Quantitative RT-PCR was performed for the relative quantification of gene expression  
158 from the lungs of noninfected and infected mice. RNA extraction was performed  
159 according to the "Animal Cell I" protocol from an RNeasy Mini kit (Qiagen, USA).  
160 cDNA synthesis was performed with a 1 µg RNA sample using the First Strand cDNA  
161 Synthesis kit RT-PCR (Roche, USA) according to the manufacturer's instructions.  
162 Finally, the PCR sample to test gene expression was prepared with SYBR Green PCR  
163 Master Mix (Applied Biosystems, USA), and the relative quantification  $2^{-\Delta\Delta CT}$  method  
164 was used as described before (51). The qRT-PCR reactions were performed in the ABI  
165 7500 Fast instrument (Applied Biosystems, USA) using the following oligonucleotides:  
166 PbA 18S (forward 5'-agcattaaataaagcgaatacatccttac-3'; reverse 5'-  
167 ggagattggtttgacgtttatgtg-3'); HPRT (forward 5'-aagcttgctggtgaaaagga-3'; reverse 5'-  
168 ttgcgctcatcttaggcttt-3'); ICAM-1 (forward 5'-cgaaggtggttcttctgagc-3'; reverse 5'-  
169 gtctgctgagccccctcttg-3'); VCAM (forward 5'-agtccgttctgacctggag-3'; reverse 5'-  
170 tgtctggagccaaacttg-3'); EPCR (forward 5'-gacgaagtttctgccgctac-3'; reverse 5'-  
171 ctggaggatggtgacgtttt-3'); TNF (forward 5'-aatggcctccctctcatcagtt-3'; reverse 5'-  
172 ccacttggtggttgctacga-3').

#### 173 **Parasite localization by bioluminescence**

174 DBA/2 mice were infected with luciferase-expressing *P. berghei* parasite (parasite line  
175 354cl4) kindly provided by the laboratory of Dr. Maria Motta from the Institute of  
176 Molecular Medicine (IMM) in Portugal. On the 7th day postinfection, 150 µl of  
177 luciferin (2.25 mg) (VivoGlo™ Luciferin, In Vivo Grid, Catalog #: P1041, Promega)  
178 was injected intraperitoneally, allowing the emission of parasite luminescence. Then,  
179 the localization of the parasite was analyzed with an IVIS Spectrum system  
180 (PerkinElmer). For this purpose, mice were sedated with isoflurane for pictures

181 (approximately 6 minutes after the injection of luciferin). Later, they were euthanized  
182 and perfused in the right ventricle with 20 ml of 1× PBS. After perfusion, a new image  
183 of the mice was captured, and the organs were collected and placed in sterile Petri  
184 dishes to observe the bioluminescence of each tissue.

### 185 **Cytokines quantification**

186 The quantities of TNF, IL-6, and IL-33 in serum and culture supernatants were  
187 determined by Mouse ELISA Ready-SET-Go! commercial kits from eBioscience (San  
188 Diego, CA, USA) specific for TNF (ref 88-7324-88), IL-6 (ref 88-7064-88) and IL-33  
189 (ref 88-7333-88) according to the manufacturer's protocols.

### 190 **Isolation of the primary microvascular lung endothelial cells**

191 Primary microvascular lung endothelial cells (PMLECs) were obtained from naive  
192 DBA/2 mice as described before (15,52). Briefly, after euthanasia, the body of the  
193 animal was disinfected with iodine/alcohol. Then, the mice had all of their blood  
194 removed by cutting the carotid artery. In a laminar flow chamber, the lung tissue was  
195 cut into fragments of approximately 1 mm<sup>2</sup> and distributed among 6-well polystyrene  
196 plates in low glucose DMEM (Invitrogen)-supplemented culture medium [20% heat  
197 inactivated FBS, 40 µg/ml gentamicin (Invitrogen-15710064) and 1:100  
198 antibiotic/antimycotic (Gibco-25200)] at 37°C and 5% CO<sub>2</sub>. After 72 hours, the tissue  
199 fragments were removed, and 50% of the medium was replaced. After 7 days of  
200 incubation, the cells were removed with trypsin 0.25% EDTA (Gibco) and replaced in a  
201 75 cm<sup>2</sup> culture flask. The trypsinization procedure was repeated every 5 to 7 days.  
202 Finally, the cells were cultured for 15 to 20 days (3<sup>rd</sup> and 5<sup>th</sup> passage) until being used in  
203 the trials. The purity of isolated DBA/2-PMLECs was characterized by  
204 immunofluorescence with lectin from *Ulex europaeus* (Sigma-Aldrich, USA– I9006)  
205 and the anti-VWF (Santa Cruz Biotechnology, USA – sc14014), anti-CD31 (Abcam,  
206 UK – ab28364), anti-ACE (Abcam, UK – ab85955), anti-CD62E (Abcam, UK -  
207 ab18981), anti-eNOS (Abcam, UK – ab87750) and anti-VE-cadherin (Abcam, UK –  
208 ab205336) antibodies. All of the cells were stained with all of the markers, indicating  
209 high purity (Figure S1).

### 210 ***Plasmodium* synchronization and enrichment of parasitized erythrocytes**

211 To obtain mature forms of *P. berghei* ANKA, iRBCs were synchronized as described  
212 previously (53). Briefly, iRBCs were collected from infected mice exhibiting 10 to 20%  
213 parasitemia through cardiac puncture and transferred to RPMI 1640 culture medium  
214 (Gibco, Thermo Fisher Scientific, USA) supplemented with 25% fetal bovine serum  
215 (FBS). The iRBCs were subsequently maintained *in vitro* at 37°C for 14 hours in an  
216 atmosphere containing 5% CO<sub>2</sub>, 85% N<sub>2</sub>, and 10% O<sub>2</sub>. The parasitized erythrocytes  
217 were then enriched using a magnetic separation column (Miltenyi Biotec, USA) to  
218 generate cell populations consisting of approximately 95% iRBCs, as assessed by thick  
219 blood smears. Lysate containing *P. berghei* was obtained from iRBCs subjected to  
220 several freeze-thaw cycles.

### 221 **Peritoneal Macrophages**

222 Peritoneal macrophages (Mφ) were collected from noninfected DBA/2 mice euthanized  
223 with halothane, the skin was then removed and 5 ml of 1× sterile cold PBS (at 4°C) was



224 inserted into the peritoneum. The liquid was then removed, aspirated with a 24-gauge  
225 needle, and centrifuged at 1000 rpm for 5 minutes at 4°C. The supernatant was  
226 discarded, and the cells were resuspended in supplemented DMEM medium [20% heat-  
227 inactivated FBS, 40 µg/ml gentamicin (Invitrogen-15710064) and 1:100 antibiotic and  
228 antimycotic (Gibco-25200)]. Cells were counted in a Neubauer chamber and arranged in  
229 Transwell culture plates pretreated with 0.2% gelatin in 1× PBS (gelatin from bovine  
230 skin, G9391, Sigma-Aldrich).

### 231 **Transwell assay with endothelial cells and peritoneal macrophages**

232 Sterile 13 mm diameter coverslips (Knittel) were placed in 24-well culture plates. The  
233 coverslips were treated with 0.2% gelatin (gelatin from bovine skin - Sigma-Aldrich)  
234 diluted in 1× PBS. PMLECs were seeded in the culture plate ( $7 \times 10^4$  cells/well) in 400  
235 µl of complete DMEM medium, and  $1 \times 10^5$  peritoneal macrophages (Mφ) were seeded  
236 in the Transwell membrane (6.5 mm membrane diameter, 0.4 µm membrane pore,  
237 Corning, Costar 3470) without making contact with the PMLECs on the bottom of the  
238 24-well plate. They only shared the supernatant through the Transwell membrane. After  
239 24 hours,  $2.5 \times 10^6$  mature iRBCs or RBCs were added over the Mφ and coincubated  
240 for 24 hours. After this time, the supernatant between the Mφ and endothelial cells was  
241 collected for the quantification of cytokines by ELISA. Subsequently, endothelial cells  
242 were coincubated with  $1.75 \times 10^6$  PbA-iRBCs for the adhesion assay.

### 243 ***Plasmodium berghei* ANKA adhesion assay under static conditions**

244 DBA/2-PMLECs were plated in a Lab-Tek chamber slide system made of Permanox  
245 containing 8 wells ( $3 \times 10^4$  cells/well) (Thermo Fisher Scientific - 177 455).  
246 Afterwards, TNF (50 ng/ml) was added to the cells and incubated for 24, 48 or 72  
247 hours. After this stimulation, synchronized PbA-iRBCs were added for 1 hour to the  
248 culture at a ratio of 25 iRBCs/PMLEC at 37°C and 5% CO<sub>2</sub>. After the incubation  
249 period, the culture medium and the removable chamber were removed, and the slides  
250 were dipped in preheated DMEM medium without FBS to eliminate unbound PbA-  
251 iRBCs. The slides were then fixed with methanol, stained with Giemsa and observed  
252 under an optical microscope immersion objective (1000×). The counting pattern used  
253 was the number of adhered PbA-iRBCs for every 100 DBA/2-PMLECs.

### 254 **Parasite adhesion assay in flowing conditions**

255 PMLECs between the 3<sup>rd</sup> and 5<sup>th</sup> passages were seeded ( $8 \times 10^4$ /well) in 2-well  
256 Permanox chamber slides from Lab-tek (Thermo Scientific, Nunc). The cells were  
257 incubated at 37°C and 5% CO<sub>2</sub> for 24 hours. After this time, TNF was added for 24  
258 hours or not added (for the control group). The stimulus was removed, and mature PbA-  
259 iRBCs (25 per cell) in DMEM supplemented with 20% FBS were added and allowed to  
260 interact with the endothelial cells for 1 hour at 37°C in 5% CO<sub>2</sub>. Subsequently, the wells  
261 were detached from the polystyrene slides, and the slides were added to a flow system  
262 composed of a chamber (cell adhesion flow chamber, Immunetics) that kept the slide  
263 adhered through the formation of a vacuum (coupled by a vacuum pump), a syringe  
264 pump (Insight Inc.), an inverted microscope (Zeiss Vert. A1) connected to a camera  
265 (Axio Cam ERc 5s, Zeiss) and a computer with an image capture system (Zen 2011  
266 program, AxioVision Rel 4.8.2 SP2). The chamber was initially filled with DMEM  
267 medium, and then an initial photo with the parasites adhered to the PMLEC-DBA/2  
268 cells was taken. Then, a medium continuous stream was run through the chamber and

269 maintained at a flow rate of 2 ml/hour with a pump syringe (Insight Inc.). Five images,  
270 taken every 3 minutes, of each well were captured while maintaining the same field as  
271 the initial image to determine the erythrocyte binding efficiency. Image processing and  
272 analysis were performed using ImageJ (version 1.46 r). The images were opened  
273 individually in ImageJ and analyzed through the "cell counter" plugin, and all PbA-  
274 iRBC images were selected on each image. After counting all the images, the total  
275 number of PbA-iRBCs that remained in the final image (taken after 15 minutes) was  
276 recorded. The experiment was repeated with two independent cultures, each with two  
277 technical replicates. Image processing and analysis were performed in ImageJ.

## 278 **Treatment with dexamethasone**

279 A total of 200  $\mu$ l (80 mg/kg) of dexamethasone (8 mg/ml Decadronal, Aché, Brazil) was  
280 taken directly from the bottle and injected intraperitoneally (ip) on days 5 and 6 post-  
281 infection. The dexamethasone dose was chosen according to the therapeutic dose  
282 observed by Van den Steen in 2010 [28]. Control mice received 200  $\mu$ l of 1 $\times$  PBS ip on  
283 the same days.

## 284 **Lung permeability and edema quantification**

285 To investigate lung permeability, noninfected or PbA-infected mice (dexamethasone-  
286 treated or not) on the 7<sup>th</sup> dpi were injected intravenously with 0.2 mL of 1% Evans Blue  
287 (Sigma-Aldrich). The mice were euthanized 45 minutes later, and the lungs were  
288 weighed immediately and placed in 2 mL of formamide (Merck) for 48 hours at 37°C  
289 [12]. The absorbance of the formamide was then measured at 620 nm and 740 nm. The  
290 amount of Evans Blue staining per gram of lung tissue was calculated from a standard  
291 curve.

## 292 **Measure of primary microvascular lung endothelial cell permeability**

293 The increased lung vascular permeability was analyzed in DBA/2-PMLECs plated on  
294 permeable membrane inserts with 0.4  $\mu$ M pores (Transwell Corning) pretreated with  
295 gelatin 0.2% in 1 $\times$  PBS (gelatin from bovine skin, G9391, Sigma-Aldrich), coupled in  
296 24-well polystyrene plates at a concentration of  $2.2 \times 10^4$  cells per insert and maintained  
297 in DMEM culture at 37°C as previously described (15). After 96 hours, when the cells  
298 reached confluency, PbA lysate was applied for 1 hour after incubation with  
299 dexamethasone (500 ng/ml for 24 h) or solely with 20% FBS-supplemented DMEM  
300 culture medium. The culture medium was subsequently replaced by Hank's balanced  
301 salt solution, and in the upper compartment of each insert in contact with the cells, 200  
302  $\mu$ l of Evans Blue was incubated at a 2 mg/mL concentration at 37°C. After 30 minutes,  
303 the liquid from the lower compartment was collected and analyzed in a  
304 spectrophotometer at a wavelength of 650 nm (NanoDrop 2000, Thermo Scientific).  
305 Finally, the concentration of Evans Blue was determined from a standard curve (0.2  
306 mg/mL to 0.0031 mg/mL) as previously described.

## 307 **Actin microfilament identification by immunofluorescent and morphometric 308 analysis of the opening of interendothelial junctions**

309 To analyze the area of opening of interendothelial junctions (OIJ), PMLECs were plated  
310 in 24-well plates ( $7 \times 10^4$  cells/well), adhered to gelatin on glass coverslips, and  
311 maintained at 37°C and 5% CO<sub>2</sub>. The cells were coincubated with either iRBCs or

312 RBCs for 1 hour after incubation with dexamethasone (24 hours) or DMEM culture  
313 medium supplemented with 20% FBS, and incubations were done in triplicate.  
314 Subsequently, the cells were fixed with 3.7% formaldehyde, permeabilized with acetone  
315 at -20°C, and blocked with bovine serum albumin solution (1% BSA). Actin was  
316 marked with Texas Red-phalloidin (T7471, Life Technologies) for 20 minutes. The cell  
317 nuclei were marked with Hoechst stain (H33342, Life Technologies). Each slide with  
318 fully confluent cells was chosen randomly, and ten to twenty pictures were taken and  
319 scanned in a “zig-zag” pattern from top to bottom. The images were acquired with an  
320 Axio Imager M2 microscope (Zeiss) using Axiocam HRc (Zeiss) and Axio Vision  
321 software, version 4.9.1.0. The total OIJ area was measured in each picture using ImageJ  
322 software (version 1.52a - NIH, USA). To calculate the OIJ, the "measure" tool and the  
323 "wand (tracing)" tool in ImageJ were used. Each image was analyzed individually, and  
324 all of the OIJs were circled with the "wand (tracing)" tool, from which the area of each  
325 space was calculated. Analysis of the differences between the openings of the  
326 interendothelial junctions following different stimuli was performed using GraphPad  
327 Prism 8<sup>®</sup> software.

### 328 **TNF blockage**

329 TNF was blocked in DBA-PMLECs using mouse TNF neutralizing (D2H4) rabbit  
330 mAb #11969 (Cell Signaling<sup>®</sup>) at a concentration of 1 µg/ml for 24 hours in PMLECs.

### 331 **Soluble EPCR quantification**

332 Soluble endothelial protein C receptor (sEPCR) was measured with an ELISA kit  
333 (Elabscience<sup>®</sup>, E-EL-M1073) according to the manufacturer's instructions.

### 334 **EPCR Western Blot**

335 Fresh frozen mouse lung tissues collected on the 7<sup>th</sup> dpi were sonicated and  
336 homogenized at 4°C using Radio-Immunoprecipitation Assay (RIPA) buffer composed  
337 of 50 mM Tris-HCl pH 8.0, 150 mM NaCl, 0.5% sodium deoxycholate, 0.2% sodium  
338 dodecyl sulfate (SDS), 1 mM sodium orthovanadate, 1 mM NaF, and a protease  
339 inhibitor tablet. The total protein concentration was determined using a SpectraMax<sup>®</sup>  
340 Plus 384 (Molecular Devices) spectrophotometer with a 562 nm filter using the  
341 Pierce<sup>™</sup> BCA Protein Assay kit (Thermo Scientific) according to the manufacturer's  
342 instructions. Then, 30 µg of protein from each sample was electrophoretically separated  
343 in a 10% polyacrylamide mini-gel (Bio-Rad) by SDS-PAGE at 100 V for 2 hours in a  
344 Mini-PROTEAN<sup>®</sup> Tetra cell apparatus (Bio-Rad). The Kaleidoscope commercial  
345 standard Precision Plus Protein Standard (Bio-Rad) was used. Subsequently, proteins  
346 separated on the gel were transferred to PVDF (polyvinylidene difluoride, 0.2 µm, Bio-  
347 Rad) membranes in transfer buffer (0.1 M Tris, 20% methanol and MilliQ water)  
348 overnight at 4°C in a wet transfer apparatus at 70 mA constant voltage (Bio-Rad).  
349 Detection of the chemiluminescence immunochemical reaction was performed on a  
350 ChemiDoc<sup>™</sup> XRS + Molecular Imager<sup>®</sup> (Bio-Rad) transilluminator with the ImageLab  
351 <sup>™</sup> program (Bio-Rad). Blocking of nonspecific sites was carried out after the transfer in  
352 Tris-buffered saline and Tween-20 buffer (0.05 M Tris, 0.1 M NaCl, pH 7.3, and 0.1%  
353 Tween-20, Synth) containing 3% BSA for 2 hours while stirring at room temperature  
354 (RT). The membrane was then incubated with the primary anti-EPCR antibody  
355 (#151403, Abcam) at 1:1,000 while stirring overnight at 4°C. After washing in TBS-T,  
356 the membrane was incubated with the peroxidase-conjugated rabbit anti-rabbit IgG



357 (HRP) secondary antibody (#AP307P, Millipore) at 1:6,000 in TBS-T for 1 hour (RT).  
358 Bands corresponding to EPCR and the housekeeping protein  $\beta$ -actin (mouse IgG  
359 #NB600-501, Novus, at 1:40,000) were detected by the chemiluminescence method  
360 (Clarity Western ECL Bio-Rad) and finally densitometrically measured by ImageJ 1.6.0  
361 software.

362

### 363 **Bronchoalveolar lavage and VEGF quantification**

364 On the 7<sup>th</sup> dpi, infected mice (untreated or treated with dexamethasone) were  
365 anesthetized, and for bronchoalveolar lavage (BAL) collection, the trachea was exposed  
366 and cannulated, and the lungs were washed once with 1.0 ml of 1× PBS. An ELISA kit  
367 (R&D Systems, USA) was used to quantify VEGF levels in BAL and in culture  
368 supernatant according to the manufacturer's instructions.

### 369 **Transfection of EPCR by siRNA**

370 To transfect EPCR by interference RNA assay, Lipofectamine® RNAiMAX reagent  
371 (Invitrogen by Life Technologies) and 3 different predesigned and validated oligo  
372 silencers (Ambion by Life Technologies) were used according to the manufacturer's  
373 protocol. Additionally, a Select Negative Control silencer [(C-) (Ambion 4390843)] and  
374 a select GAPDH positive control silencer [(C+) (Ambion 4390849) were employed as  
375 control reactions.

376 siRNA1: forward: 5' CAACCGGACUCGGUAUGAATT 3';

377 reverse: 5' UUCAUACCGAGUCCGGUUGta3'

378 siRNA2: forward: 5' ACGCAAAACAUGAAAGGGATT 3';

379 reverse: 5' UCCCUUUCAUGUUUUGCGUGG 3'

380 siRNA3: forward: 5' CGCCCUUUGUAACUCCGAUTT 3';

381 reverse: 5' AUCGGAGUUACAAAGGGCGCA3'

### 382 **Immunohistochemistry of ICAM-1 and VCAM in lungs**

383 To perform immunohistochemistry of ICAM-1 and VCAM, slides containing the  
384 paraffin tissue sections were placed in an incubator at 60°C for 20 minutes to melt the  
385 paraffin. Then, they were incubated in xylene twice for 15 min at 60°C and then in  
386 absolute ethanol, 95% alcohol, 70% alcohol, distilled water, and finally 1× PBS, pH 7.2  
387 to 7.4. For antigen retrieval, the slides were incubated in sodium citrate buffer, pH 6, for  
388 45 minutes at 95°C. Endogenous peroxidase was blocked with 3% hydrogen peroxide  
389 for 15 minutes twice at room temperature while protected from light. The tissue was  
390 probed with rabbit polyclonal to ICAM-1 (1:400) antibody (Abcam, ab124759) and  
391 rabbit monoclonal to VCAM (1:600) antibody (Abcam ab134047) overnight at 4°C, and  
392 then the REVEAL mouse/rabbit kit (Spring, Code SPD-015) was used in accordance  
393 with the manufacturer's instructions. The quantification of ICAM-1 and VCAM in lung  
394 tissue was performed by calculating the marked area normalized to the total tissue  
395 section. The calculation was performed in ImageJ (version 1.50b) software using the  
396 IHC toolbox plugin [29].

### 397 **Statistical Analysis**

398 The statistical analyses were performed using GraphPad Prism<sup>®</sup> 5.0 software for  
399 analysis and graphing. The data were analyzed for normality by the Kolmogorov-  
400 Smirnov test or the Shapiro-Wilk normality test and for variance with the Bartlett test.  
401 Nonparametric variables for two groups were compared by using the Mann-Whitney  
402 test. For analysis of three groups, we used the Kruskal-Wallis test followed by the  
403 Dunn's post hoc test. To compare parametrical variables for two groups, a t-test was  
404 employed, and for three or more groups, one-way ANOVA followed by the Bonferroni  
405 posttest was used. For the survival curves, log-rank and Gehan-Breslow Wilcoxon tests  
406 were applied. The differences between the groups were considered significant when  
407  $p \leq 0.05$  (5%). To establish a cut-off from the data, ROC curves were generated by using  
408 the results of the control group obtained in MedCalc version 8.2.1.0.

#### 409 **Ethics Statement**

410 All experiments were performed in accordance with the ethical guidelines for  
411 experiments with mice, and the protocols were approved by the Animal Health  
412 Committee of the Biomedical Sciences Institute of the University of São Paulo (CEUA  
413 n° 24, page 16, book 03). The guidelines for animal use and care were based on the  
414 standards established by the National Council for Control of Animal Experimentation  
415 (CONCEA: Conselho Nacional de Controle de Experimentação Animal) and Brazilian  
416 Federal Law n° 11.794.

#### 417 **RESULTS**

##### 418 **ARDS-developing mice show higher levels of pulmonary parasite than HP-** 419 **developing mice**

420 In our previous study, it was shown that a proportion of DBA/2 mice infected with  
421 PbA-iRBC developed singular characteristics of ARDS and died between the 7<sup>th</sup> and  
422 12<sup>th</sup> dpi [12–15]. To investigate whether adherence is essential in the evolution of this  
423 phenotype, we observed that luciferase-expressing *P. berghei* parasites were distributed  
424 in the peripheral blood and tissues of DBA/2 mice. However, when they were perfused  
425 with 1× PBS, the bioluminescence (luciferase/luciferin) signal remained concentrated in  
426 the spleen and lungs, especially in ARDS-developing mice (Figure 1 a-c), corroborating  
427 our published data where we showed more bioluminescence signal in ARDS mice  
428 compared to HP [14]. We demonstrated that ARDS-developing mice showed higher  
429 levels of 18S subunit PbA rRNA expression (Figure 1d) and higher hemozoin  
430 concentrations in the lungs compared to those of HP-developing mice on the 7<sup>th</sup> dpi  
431 (Figure 1 e-g). In addition, we analyzed histological lung sections of mice that died with  
432 ARDS and found several iRBCs in close contact with endothelial cells (Figure 1h).  
433 These results taken together indicated that ARDS-developing mice accumulated a  
434 considerable amount of iRBCs in the lungs, suggesting their essential participation in  
435 ARDS pathogenesis.

##### 436 **TNF increases *P. berghei* adherence in the ARDS experimental model**

437 ARDS-developing mice on the 7<sup>th</sup> dpi displayed higher TNF levels in serum compared  
438 to those of HP-developing mice (Figure 2a), suggesting that this inflammatory cytokine  
439 may be critical to ARDS development. We further investigated whether iRBCs could  
440 contribute to TNF release by endothelial cells. First, we demonstrated that primary  
441 microvascular lung endothelial cells (PMLECs) stimulated with iRBCs can directly

442 contribute to TNF production (Figure 2b). Then, we examined the influence of TNF on  
443 the adhesion of iRBCs to PMLECs using static and flow conditions. TNF-stimulated  
444 cells increased the capacity of iRBCs to adhere to PMLECs after 24 and 72 hours in the  
445 static assay (Figure 2 c-e). In the flow adherence assay, which mimics physiologic  
446 conditions, the iRBCs had more cytoadherence with TNF than without TNF stimulation  
447 (Figure 2 f-h). Additionally, peritoneal macrophages (M $\phi$ ), collected from noninfected  
448 DBA/2 mice, were seeded in Transwell membranes, and then PMLECs were seeded on  
449 the bottom of a 24-well plate with no contact with the M $\phi$  and were or were not  
450 stimulated by red blood cells (RBCs) or iRBCs (Figure 2i). M $\phi$  stimulated by iRBCs  
451 produced more TNF than M $\phi$  without contact with iRBCs (Figure 2j). Additionally,  
452 PMLECs that were in indirect contact with M $\phi$  stimulated with iRBCs demonstrated  
453 more adherence to iRBCs than PMLECs with no previous contact with M $\phi$  (Figure 2k).  
454 Finally, to evaluate the contribution of TNF to the adhesion of iRBCs to PMLECs, the  
455 cells were blocked with TNF antibody, and as a result, the blockage reduced the  
456 capacity of iRBCs to adhere to PMLECs (Figure 2l). All these data show that ARDS-  
457 developing mice express more TNF, which contributes to iRBC adherence, in  
458 endothelial cells than in HP-developing mice.

#### 459 **EPCR contributes to *P. berghei* cytoadherence**

460 Looking for adhesion molecules that could be involved in PbA-iRBC cytoadherence in  
461 ARDS pathogenesis, we observed that ARDS-developing mice showed higher levels of  
462 VCAM and ICAM-1 in lungs than HP-developing or noninfected mice (NI) as analyzed  
463 by immunohistochemistry (Figure S2 a-c). Additionally, recombinant TNF upregulated  
464 the mRNA expression of ICAM-1 and VCAM in PMLECs (Figure S2 d-i). However,  
465 the most interesting finding was the upregulation of mRNA EPCR expression in the  
466 lungs of ARDS-developing mice compared to NI mice (28.48-fold increase) and HP-  
467 developing mice (13.16-fold increase) (Figure 3a). There was also an increase in soluble  
468 EPCR (sEPCR) (Figure 3b) and EPCR protein (Figure 3c) in ARDS-developing mice  
469 serum compared to HP-developing mice. We further investigated the influence of TNF  
470 on the regulation of EPCR expression in PMLECs. TNF-stimulated cells showed an  
471 upregulation of EPCR expression at 48 and 72 hours, but this was not seen with PbA-  
472 iRBC stimulation (Figure 3 d-f). Moreover, EPCR knockdown with siRNA transfection  
473 (siEPCR) in PMLECs reduced EPCR expression compared to that in nontransfected  
474 PMLECs (Figure 3g). In addition, in siEPCR cells, iRBC adhesion was reduced  
475 compared to TNF-stimulated and nontransfected cells (Figure 3h).

#### 476 **Dexamethasone reduces TNF and EPCR, protecting mouse lungs and PMLECs** 477 **from increased vascular permeability**

478 Once TNF seemed to be important to induce PbA-iRBC adherence and consequently  
479 ARDS development, DBA/2 mice were infected with PbA-iRBC and treated with  
480 dexamethasone (80 mg/kg) on days 5 and 6 post-infection to investigate whether it  
481 could protect them from lung injury.

482 Dexamethasone treatment decreased TNF concentrations in the plasma (Figure 4a) apart  
483 from IL-6 and IL-33 concentrations in treated mice compared to those of nontreated  
484 mice (Figure S3 a and b). Dexamethasone also downregulated EPCR (Figure 4b) and  
485 VCAM (Figure S2 c) expression but not ICAM expression (Figure S2 d) in the lungs of  
486 infected mice. The soluble EPCR concentrations in the serum and bronchoalveolar  
487 lavage (BAL) are shown (Figure 4c and d). The concentration of VEGF, an essential

488 factor to increase vascular permeability and ARDS development, also decreased after  
489 dexamethasone treatment in the BAL of infected mice on the 7<sup>th</sup> dpi (Figure 4e).  
490 Consequently, we analyzed lung vascular permeability, and dexamethasone-treated  
491 infected mice were protected compared to nontreated mice (Figure 4f-h). To clarify the  
492 mechanism that reduced lung permeability, the openings of interendothelial junctions in  
493 PMLECs were evaluated through actin analysis. The PMLECs stimulated with iRBCs  
494 increased the spaces between the interendothelial junctions and led to disruption and  
495 reorganization in the actin filaments, which were protected by treatment with  
496 dexamethasone (Figure 4i and j). iRBC-stimulated PMLECs also demonstrated more  
497 permeability for Evans Blue dye in a Transwell assay compared to dexamethasone-  
498 treated PMLECs (Figure 4k). Additionally, dexamethasone-treated PMLECs showed a  
499 reduction in VEGF concentration compared to cells untreated with dexamethasone  
500 (Figure 4l). With everything considered, these data suggest that dexamethasone is  
501 capable of reducing inflammation and decreasing EPCR levels and vascular  
502 permeability in PMLECs and the lungs of DBA/2 mice.

503

504 **Figure 4: Dexamethasone reduces TNF and EPCR, protecting mouse lungs and**  
505 **PMLECs from increased vascular permeability.**

506 DBA/2 mice infected with *Plasmodium berghei* ANKA were treated with  
507 dexamethasone (80 mg/kg in 200  $\mu$ l), and their serum and perfused lungs were collected  
508 on the 7<sup>th</sup> day postinfection (dpi) and compared to those of infected-untreated mice  
509 (received 200  $\mu$ l of 1 $\times$  PBS). (a) The TNF concentration was analyzed in the serum  
510 (ELISA). (b) EPCR mRNA expression was analyzed in the lungs by qRT-PCR with the  
511  $2^{-\Delta\Delta CT}$  method (normalized to noninfected control mice and HPRT gene expression). (c)  
512 The sEPCR concentration was evaluated in both sera and (d) bronchoalveolar lavage  
513 (BAL). (e) The VEGF concentration was also evaluated in BAL of infected mice treated  
514 or untreated with dexamethasone. Evans Blue (EB) was injected into infected and  
515 noninfected (treated or not treated with dexamethasone) mice, and (f-g) EB  
516 accumulation in the lungs and (h) lung weights (after perfusion) were compared  
517 between groups. (i-j) Some primary microvascular lung endothelial cells (PMLECs)  
518 were treated with dexamethasone but others were not, and they were subsequently  
519 coincubated with either infected red blood cells (iRBCs) or red blood cells (RBCs). (i)  
520 PMLECs were stained for actin microfilaments (gray), and nuclei were stained with  
521 Hoechst stain (blue), which showed openings in the interendothelial junctions (OIJ)  
522 (indicated by yellow arrows). (j) Measurements of the OIJ were compared among all  
523 groups. (k) The permeability of dexamethasone-treated PMLECs was compared using  
524 Evans blue in a Transwell assay. (l) The VEGF concentration was measured in these  
525 groups. Infected+Dexa: *P. berghei* ANKA-infected and dexamethasone-treated mice.  
526 Graphics a, d, g and h: Mann-Whitney test representative of two independent  
527 experiments; b: Unpaired t-test from two grouped experiments; c: Mann-Whitney test  
528 from two grouped experiments; e: Unpaired t-test representative of two independent  
529 experiments; i: Kruskal-Wallis test from three grouped experiments; k: Unpaired t-test  
530 from three grouped experiments and L: One-way ANOVA representative of two  
531 independent experiments. Bars represent the average  $\pm$  SD (\*p<0.05; \*\*p<0.01;  
532 \*\*\*p<0.0001). Red dashed lines: noninfected mice.

533 **Anti-inflammatory drug protects mice from ARDS but not from malaria infection**

534 Dexamethasone-treated mice improved their respiratory parameters [respiratory  
535 frequency, tidal volume and enhanced pause (Penh)] compared to infected nontreated

536 mice on the 7<sup>th</sup> dpi (Figure 5 a-c). On the other hand, parasitemia levels increased in the  
537 peripheral blood of dexamethasone-treated mice on the 7<sup>th</sup> dpi (Figure 5d), and these  
538 mice succumbed between 8 and 20 dpi (Figure 5e) with characteristics of HP without  
539 edema and lower inflammatory infiltration according to the histopathological analyses  
540 (Figure 5 f-g) and count of iRBC data (Figure 5d). Finally, we proposed the essential  
541 mechanisms of protection for dexamethasone in experimental malaria (Figure 6),  
542 suggesting that PbA-iRBCs induce TNF release by endothelial cells and by M $\phi$ , and  
543 then TNF upregulates EPCR expression in PMLECs, increasing iRBC adhesion through  
544 the EPCR pathway. The adhesion of iRBCs in pulmonary endothelial cells leads to an  
545 increase in gap formation in the interendothelial junction, raising vascular permeability  
546 and consequently the formation of edema. Activated alveolar macrophages also produce  
547 TNF, which contributes to the activation of endothelial cells and possibly the  
548 recruitment of neutrophils [14] and alveolar damage. The drastic reduction in  
549 inflammation with dexamethasone treatment may be responsible for the increase in  
550 parasitemia and mortality. These data suggest that TNF is essential to increase the  
551 expression of EPCR and consequently increase adhesion of iRBCs in malaria-associated  
552 ARDS.

## 553 Discussion

554 In the present study, we describe the cytoadherence of PbA-iRBCs in microvascular  
555 lung endothelial cells in mice that develop ARDS as well as the importance of the  
556 EPCR in this mechanism and consequently in ARDS pathogenesis. An important  
557 advantage of this study is that our animal model reproduces the physiopathological  
558 aspects found in human ARDS patients [12,13,30].

559 It is well known that mature forms of *P. falciparum*-iRBCs can adhere to the  
560 microvasculature of different organs, which is an important feature in the pathogenesis  
561 of severe malaria in humans [5,31]. However, there are only a few studies focusing on  
562 cytoadherence in ARDS [11,28,32,33], and the mechanism of this is not entirely known.  
563 Previously, we found that ARDS-developing mice showed a higher level of parasites in  
564 their lungs than HP-developing mice, which may be important to induce malaria [14].  
565 Our work reinforces that PbAluc-iRBC accumulated in the lungs of ARDS-developing  
566 mice, which could contribute to pathogenesis. Additionally, ARDS-developing mice  
567 showed a larger hemozoin (Hz) area in the lungs than HP-developing mice on the 7<sup>th</sup>  
568 dpi, which is consistent with the onset of ARDS development as patients from Thailand  
569 with ARDS development presented a significant amount of pulmonary Hz [34]. Some  
570 previous works suggest that Hz, which is released from the food vacuole into circulation  
571 during erythrocyte lysis, is rapidly taken up by circulating monocytes and tissue  
572 macrophages, inducing the production of pro-inflammatory mediators [35,36]. In  
573 addition, Hz linked by *Plasmodium* DNA is a ligand for TLR 9, which activates innate  
574 immune responses *in vivo* and *in vitro*, resulting in the production of cytokines and  
575 chemokines and the upregulation of costimulatory molecules [37,38] and  
576 proinflammatory mediators such as IL-1 $\beta$  via NLP3 inflammasome complex activation  
577 [36].

578 It is known that iRBCs adhere to endothelial cells *in vivo* and *in vitro*. Recently, PbA-  
579 iRBCs have been demonstrated to adhere to MVECs (microvascular lung endothelial  
580 cells from CBA/Ca mice) *in vitro*, and TNF-stimulated cells expressed more ICAM-1  
581 and VCAM [16]. Other studies showed that endothelial cells stimulated with TNF  
582 showed an increase in ICAM-1 expression [32,39], corroborating our results *in vivo* and  
583 *in vitro* that recently demonstrated that TNF and ICAM-1 markers were increased in the



584 lungs of patients who had developed the syndrome [34]. The inhibition of *P. falciparum*  
585 iRBC adherence in TNF-activated HUVECs incubated with either anti-ELAN-1 mAB  
586 BBII or anti-VCAM mAB 4B9 [40] was not observed, suggesting that other molecules  
587 could contribute to the adhesion of iRBCs. It is interesting to highlight that the parasites  
588 by themselves (PbA-iRBC or PbA lysate) cannot upregulate ICAM-1, VCAM or EPCR  
589 expression in DBA/2-PMLECs. In fact, PbA-iRBCs adhere more to TNF-stimulated  
590 DBA/2-PMLECs than nonstimulated cells. We previously observed the close contact  
591 between PbA-iRBCs and endothelial cell membranes in the lungs of ARDS-developing  
592 mice [30]. A limiting condition in our data was that the adherence of iRBCs in  
593 nonstimulated PMLECs was too small. Thus, we could not find a difference in adhesion  
594 between nonstimulated cells and anti-TNF-treated cells because both reached basal  
595 levels (Fig. 2I). Nevertheless, the study reported here is the first showing the mechanism  
596 of PbA-iRBC adhesion using DBA/2 mice that had developed ARDS. We found that  
597 ARDS-developing mice have approximately 28.5 times more EPCR expression than  
598 uninfected mice; they showed more EPCR protein in their lungs than HP-developing  
599 mice, and TNF-stimulated PMLECs show an upregulation in EPCR expression  
600 compared to that of nonstimulated cells (NS) or cells stimulated with iRBCs, indicating  
601 that EPCR can contribute to ARDS progression. Similarly, a study indicated that  
602 children in Papua New Guinea with severe malaria had higher antibody levels against  
603 EPCR binding to CIDR $\alpha$ 1 domains compared to uncomplicated malaria and this  
604 difference was only found in older children [41]. However, in a recent study, the  
605 expression of EPCR decreased in the lungs of *P. falciparum*-infected patients who  
606 developed ARDS when compared to those who did not develop ARDS as analyzed by  
607 immunohistochemistry. The authors suggest that the change in EPCR together with  
608 thrombomodulin and in association with the deposition of hemozoin in the lungs plays  
609 an important role in the pathogenesis of ARDS [34]. Additionally, reduced sEPCR  
610 serum levels were detected in children with severe malaria, and these levels were higher  
611 in cerebral liquid from children with cerebral malaria. Despite this, sEPCR levels were  
612 not related to mortality or neurologic manifestations at discharge or 6-month follow-up  
613 [42].

614 With the hypothesis that inflammation is essential to expose adherence molecules and  
615 consequently to ARDS pathogenesis, we treated DBA/2 mice with 80 mg/kg of  
616 dexamethasone. The 80 mg/kg dose is the therapeutic dose for ARDS treatment in mice  
617 observed by Van den Steen in 2010, because lower doses did not protect mice from  
618 ARDS and edema [28]. In contrast, dexamethasone was administered to patients  
619 suffering from ARDS (different etiologies) at lower doses: 5 mg/day for 4 days in  
620 ARDS patients with bacterial pneumonia [43] and 10 mg for 6 hours in ARDS patients  
621 with acute leucocyte leukemia [44]. In two well-conducted studies, dexamethasone  
622 failed to improve the fatality rate of cerebral malaria [45,46]. Unfortunately, the use of  
623 corticosteroids in acute respiratory distress syndrome (ARDS) due to malaria in humans  
624 has not been well explored [47]. In our experiments, we observed that dexamethasone-  
625 treated mice were protected from ARDS and showed the downregulation in EPCR  
626 expression, which indicates that EPCR may be necessary for iRBC adherence and the  
627 progression of disease. However, there are specific domains of the PfEMP1 subfamily  
628 that do not bind to EPCR while others do [19], although the presence of serum inhibits  
629 this binding during *in vitro* assays [24]. However, recently, a new study showed that  
630 using human brain microvascular endothelial cells and 10% human serum did not affect  
631 the binding between *P. falciparum*-infected red blood cells and EPCR. In addition,  
632 parasites isolated from patients with cerebral malaria displayed higher binding capacity  
633 of cytoadherence under flow conditions, compared with isolated from uncomplicated

634 malaria patients [48]. Parasite var transcripts encoding EPCR-binding domains, in  
635 association with high load of parasite and low platelet levels, are hardy indicators of  
636 cerebral malaria. Patients with cerebral edema showed an increased transcript of  
637 parasite PfEMP1 DC8 and group A EPCR-binding domains. In addition 62B1-1-  
638 CIDRa1.7 affected EPCR-APC interaction and the authors proposed a harmful role for  
639 EPCR-binding domains in these patients [49]. Therefore, the exact role of EPCR is  
640 controversial and needs to be better understood. In addition, dexamethasone-treated  
641 mice are less susceptible to increased vascular permeability. Likewise, iRBC-stimulated  
642 PMLECs treated with dexamethasone showed less permeability than untreated cells. *P.*  
643 *berghei* NK65-infected C57bl/6 mice treated with the same dose of dexamethasone also  
644 showed an increase in peripheral parasitemia and ARDS protection [28] but not an  
645 effect on pulmonary vascular permeability.

646 Based on our results, treatment with dexamethasone, a potent anti-inflammatory drug,  
647 decreased the serum concentrations of IL-33, IL-6, and TNF in PbA-infected mice. IL-  
648 33 is a tissue-derived nuclear cytokine from the IL-1 family, and it is highly expressed  
649 during homeostasis and inflammation in endothelial, epithelial and fibroblast-like cells,  
650 working as an alarm signal released upon cell injury or tissue damage to alert immune  
651 cells to express the ST2 receptor (IL-1RL1) [50]. Bronchial IL-33 expression is  
652 significantly increased in severe malaria patients with pulmonary edema [51].  
653 Moreover, in PbA-induced experimental cerebral malaria (ECM), IL-33 expression is  
654 increased in the brain, and ST2-deficient mice were resistant to PbA-induced  
655 neuropathology [52,53]. On the other hand, PbA-infected C57BL/6 mice treated with  
656 recombinant IL-33 presented no signs of neurological pathology associated with CM  
657 and had reduced production of pro-inflammatory cytokines and chemokines [54].

658 Circulating IL-6 levels are elevated in nearly all infectious, traumatic, and inflammatory  
659 states, including ARDS. Elevated levels of IL-6 are found in the BAL and plasma of  
660 patients with ARDS and those at risk [55,56]. Finally, TNF is an inflammatory mediator  
661 strongly implicated in the development of ARDS [57] signaling through two receptors,  
662 p55 and p75, that play differential roles in pulmonary edema formation during ARDS. It  
663 was shown by a novel domain antibody (dAb<sup>TM</sup>) that p55 attenuated ventilator-induced  
664 lung injury [58] and lung injury and edema formation in models of ARDS induced by  
665 acid aspiration [57]. Recently, the selective blockage of TNFR1 (GSK1995057  
666 antibody) inhibited cytokine and neutrophil adhesion molecule expression in activated  
667 HMVEC-L monolayers *in vitro* and attenuated inflammation and signs of lung injury in  
668 primates [59]. Moreover, treatment with this antibody attenuated pulmonary  
669 neutrophilia, inflammatory cytokine release and signs of endothelial injury in BAL and  
670 serum samples in healthy humans challenged with a low dose of inhaled endotoxin [59].

## 671 **Conclusions**

672 Our data together suggest that *P. berghei* infection induces TNF production by  
673 inflammatory and endothelial cells, leading to the expression of adhesion molecules  
674 such as ICAM-1, VCAM and, especially, EPCR. These results allow us to infer that  
675 those factors contribute to PbA-iRBC cytoadhesion and thus suggest the participation of  
676 these mechanisms in the pathogenesis of malaria-associated ARDS. Knowing that  
677 inhibition of cytoadhesion mechanisms may improve the prognosis of infection [60], we  
678 emphasize that the processes described above may be important in the treatment of  
679 ARDS due to *Plasmodium* infection, acting as adjunctive therapy in association with the  
680 use of antimalarials, not only making the treatment more efficient but also reducing the  
681 morbidity and mortality of these patients.

682 **Conflicts of Interest**

683 The authors declare that the research was conducted in the absence of any commercial  
684 or financial relationships that could be construed as a potential conflict of interest.

685 **Funding Statement**

686 This work was supported by the São Paulo Research Foundation (Fundação de  
687 Amparo a pesquisa do estado de São Paulo: FAPESP, Brazil), the Coordination of  
688 Improvement of HigherLevel Personnel; (Coordenação de Aperfeiçoamento de Pessoal  
689 de Nível Superior: CAPES) and the National Council for Scientific and Technological  
690 Development (Conselho Nacional de Desenvolvimento Científico e Tecnológico:  
691 CNPq, Brazil). LSO (CAPES and FAPESP 2013/20718-3), MKS (CAPES/ PNPd),  
692 GCM (FAPESP 2017/00077-4), TCQ (CNPq 131431/2017-0), DD (CNPq  
693 162730/2014-4), DSC (CNPq 133890/2016-3), OM (FAPESP 2013/00981-1), CRFM  
694 (FAPESP 2016/07030-3), SE (FAPESP 2014/20451-0 and 2017/05782-8), and CNPQ  
695 (455863/2014-8) received fellowship grants.

696 **Acknowledgments**

697 The authors thank Patricia Mendonça da Silva Amorim, Erika Paula Machado Peixoto,  
698 and Bernardo Paulo Albe for their technical assistance.

699 **REFERENCES**

- 700 1. Craig AG, Khairul MFM, Patil PR. Cytoadherence and severe malaria. *Malays J*  
701 *Med Sci* [Internet]. 2012 Apr [cited 2013 Mar 19];19(2):5–18. Available from:  
702 [http://www.pubmedcentral.nih.gov/articlerender.fcgi?artid=3431742&tool=pmce](http://www.pubmedcentral.nih.gov/articlerender.fcgi?artid=3431742&tool=pmcentrez&rendertype=abstract)  
703 [ntrez&rendertype=abstract](http://www.pubmedcentral.nih.gov/articlerender.fcgi?artid=3431742&tool=pmcentrez&rendertype=abstract)
- 704 2. Beeson JG, Brown G V. Pathogenesis of Plasmodium falciparum malaria: the  
705 roles of parasite adhesion and antigenic variation. *Cell Mol Life Sci* [Internet].  
706 2002 Feb;59(2):258–71. Available from:  
707 <http://www.ncbi.nlm.nih.gov/pubmed/11915943>
- 708 3. Miller LH, Baruch DI, Marsh K, Doumbo OK. The pathogenic basis of malaria.  
709 *Nature* [Internet]. 2002 Feb 7;415(6872):673–9. Available from:  
710 <http://www.ncbi.nlm.nih.gov/pubmed/11832955>
- 711 4. Greenwood BM, Fidock DA, Kyle DE, Kappe SHI, Alonso PL, Collins FH, et al.  
712 Malaria: progress, perils, and prospects for eradication. *J Clin Invest* [Internet].  
713 2008 Apr [cited 2013 Feb 27];118(4):1266–76. Available from:  
714 [http://www.pubmedcentral.nih.gov/articlerender.fcgi?artid=2276780&tool=pmce](http://www.pubmedcentral.nih.gov/articlerender.fcgi?artid=2276780&tool=pmcentrez&rendertype=abstract)  
715 [ntrez&rendertype=abstract](http://www.pubmedcentral.nih.gov/articlerender.fcgi?artid=2276780&tool=pmcentrez&rendertype=abstract)
- 716 5. Pouvelle B, Buffet P a, Lépolard C, Scherf a, Gysin J. Cytoadhesion of  
717 Plasmodium falciparum ring-stage-infected erythrocytes. *Nat Med* [Internet].  
718 2000 Nov;6(11):1264–8. Available from:  
719 <http://www.ncbi.nlm.nih.gov/pubmed/11062539>
- 720 6. Rénia L, Wu Howland S, Claser C, Charlotte Gruner A, Suwanarusk R, Hui Teo  
721 T, et al. Cerebral malaria: mysteries at the blood-brain barrier. *Virulence*  
722 [Internet]. 2012 [cited 2013 Mar 8];3(2):193–201. Available from:  
723 [http://www.pubmedcentral.nih.gov/articlerender.fcgi?artid=3396698&tool=pmce](http://www.pubmedcentral.nih.gov/articlerender.fcgi?artid=3396698&tool=pmcentrez&rendertype=abstract)  
724 [ntrez&rendertype=abstract](http://www.pubmedcentral.nih.gov/articlerender.fcgi?artid=3396698&tool=pmcentrez&rendertype=abstract)
- 725 7. Grommes J, Soehnlein O. Contribution of neutrophils to acute lung injury. *Mol*

- 726 Med [Internet]. 2011 [cited 2011 Jul 20];17(3–4):293–307. Available from:  
727 <http://www.pubmedcentral.nih.gov/articlerender.fcgi?artid=3060975&tool=pmcentrez&rendertype=abstract>  
728
- 729 8. Bhatia M, Zemans RL, Jeyaseelan S. Role of chemokines in the pathogenesis of  
730 acute lung injury. *Am J Respir Cell Mol Biol* [Internet]. 2012 May [cited 2013  
731 Mar 7];46(5):566–72. Available from:  
732 <http://www.ncbi.nlm.nih.gov/pubmed/22323365>
- 733 9. Matute-Bello G, Martin TR. Science review: apoptosis in acute lung injury. *Crit*  
734 *Care* [Internet]. 2003 Oct [cited 2011 Jul 29];7(5):355–8. Available from:  
735 <http://www.pubmedcentral.nih.gov/articlerender.fcgi?artid=270707&tool=pmcentrez&rendertype=abstract>  
736
- 737 10. Van den Steen PE, Deroost K, Deckers J, Van Herck E, Struyf S, Opdenakker G.  
738 Pathogenesis of malaria-associated acute respiratory distress syndrome. *Trends*  
739 *Parasitol* [Internet]. 2013 Jun 3 [cited 2013 Jun 10];29(7):346–58. Available  
740 from: <http://www.ncbi.nlm.nih.gov/pubmed/23742967>
- 741 11. Lovegrove FE, Gharib S a, Peña-Castillo L, Patel SN, Ruzinski JT, Hughes TR,  
742 et al. Parasite burden and CD36-mediated sequestration are determinants of acute  
743 lung injury in an experimental malaria model. *PLoS Pathog* [Internet]. 2008 May  
744 [cited 2012 Mar 18];4(5):e1000068. Available from:  
745 <http://www.pubmedcentral.nih.gov/articlerender.fcgi?artid=2364663&tool=pmcentrez&rendertype=abstract>  
746
- 747 12. Ortolan LS, Sercundes MK, Barboza R, Debone D, Murillo O, Hagen SCF, et al.  
748 Predictive criteria to study the pathogenesis of malaria-associated ALI/ARDS in  
749 mice. *Mediators Inflamm* [Internet]. 2014 Jan [cited 2014 Dec 16];2014:872464.  
750 Available from:  
751 <http://www.pubmedcentral.nih.gov/articlerender.fcgi?artid=4167651&tool=pmcentrez&rendertype=abstract>  
752
- 753 13. Epiphany S, Campos MG, Pamplona A, Carapau D, Pena AC, Ataíde R, et al.  
754 VEGF promotes malaria-associated acute lung injury in mice. *PLoS Pathog*  
755 [Internet]. 2010 May [cited 2011 Jul 12];6(5):e1000916. Available from:  
756 <http://www.pubmedcentral.nih.gov/articlerender.fcgi?artid=2873913&tool=pmcentrez&rendertype=abstract>  
757
- 758 14. Sercundes MK, Ortolan LS, Debone D, Soeiro-Pereira P V., Gomes E, Aitken  
759 EH, et al. Targeting neutrophils to Prevent Malaria-Associated Acute Lung  
760 Injury/Acute respiratory Distress Syndrome in Mice. *PLOS Pathog* [Internet].  
761 2016;12(12):e1006054. Available from:  
762 <http://www.ncbi.nlm.nih.gov/pubmed/27926944> <http://dx.plos.org/10.1371/journal.ppat.1006054>  
763
- 764 15. Pereira MLM, Ortolan LS, Sercundes MK, Debone D, Murillo O, Lima FA, et al.  
765 Association of Heme Oxygenase 1 with Lung Protection in Malaria-Associated  
766 ALI/ARDS. *Mediators Inflamm*. 2016;2016.
- 767 16. El-Assaad F, Wheway J, Mitchell AJ, Lou J, Hunt NH, Combes V, et al.  
768 Cytoadherence of Plasmodium berghei-infected red blood cells to murine brain  
769 and lung microvascular endothelial cells in vitro. *Infect Immun* [Internet]. 2013  
770 Aug 12 [cited 2013 Aug 20];81(11):3984–91. Available from:  
771 <http://www.ncbi.nlm.nih.gov/pubmed/23940206>
- 772 17. Cunningham DA, Lin J, Brugat T, Jarra W, Tumwine I, Kushinga G, et al.  
773 ICAM-1 is a key receptor mediating cytoadherence and pathology in the  
774 Plasmodium chabaudi malaria model. *Malar J* [Internet]. 2017;16(1):185.  
775 Available from:



- 776 <http://malariajournal.biomedcentral.com/articles/10.1186/s12936-017-1834-8>  
777 18. Aird WC, Mosnier LO, Fairhurst RM. Plasmodium falciparum picks (on) EPCR.  
778 Blood. 2014;123(2):163–7.  
779 19. Turner L, Lavstsen T, Berger SS, Wang CW, Petersen JE V, Avril M, et al.  
780 Severe malaria is associated with parasite binding to endothelial protein C  
781 receptor. Nature [Internet]. 2013;498(7455):502–5. Available from:  
782 [http://www.pubmedcentral.nih.gov/articlerender.fcgi?artid=3870021&tool=pmce](http://www.pubmedcentral.nih.gov/articlerender.fcgi?artid=3870021&tool=pmcentrez&rendertype=abstract)  
783 [ntrez&rendertype=abstract](http://www.pubmedcentral.nih.gov/articlerender.fcgi?artid=3870021&tool=pmcentrez&rendertype=abstract)  
784 20. Rao LVM, Esmon CT, Pendurthi UR. Review Article Endothelial cell protein C  
785 receptor: a multiliganded and multifunctional receptor. Blood.  
786 2014;124(10):1553–63.  
787 21. Shabani E, Opoka RO, Bangirana P, Park GS, Vercellotti GM, Guan W, et al.  
788 The endothelial protein C receptor rs867186-GG genotype is associated with  
789 increased soluble EPCR and could mediate protection against severe malaria. Nat  
790 Publ Gr. 2016;  
791 22. Mosnier LO, Lavstsen T. The role of EPCR in the pathogenesis of severe  
792 malaria. Thromb Res [Internet]. 2016;141:S46–9. Available from:  
793 [http://dx.doi.org/10.1016/S0049-3848\(16\)30364-4](http://dx.doi.org/10.1016/S0049-3848(16)30364-4)  
794 23. Moxon CA, Wassmer SC, Milner DA, Chisala N V., Taylor TE, Seydel KB, et  
795 al. Loss of endothelial protein C receptors links coagulation and inflammation to  
796 parasite sequestration in cerebral malaria in African children. Blood.  
797 2013;122(5):842–51.  
798 24. Azasi Y, Lindergard G, Ghumra A, Mu J, Miller LH, Rowe JA. Infected  
799 erythrocytes expressing DC13 PfEMP1 differ from recombinant proteins in  
800 EPCR-binding function. Proc Natl Acad Sci [Internet]. 2018;201712879.  
801 Available from: <http://www.pnas.org/lookup/doi/10.1073/pnas.1712879115>  
802 25. Livak KJ, Schmittgen TD. Analysis of relative gene expression data using real-  
803 time quantitative PCR and the 2(-Delta Delta C(T)) Method. Methods [Internet].  
804 2001 Dec [cited 2011 Jul 15];25(4):402–8. Available from:  
805 <http://www.ncbi.nlm.nih.gov/pubmed/11846609>  
806 26. Chen SF, Fei X, Li SH. A new simple method for isolation of microvascular  
807 endothelial cells avoiding both chemical and mechanical injuries. Microvasc Res  
808 [Internet]. 1995 Jul [cited 2013 May 14];50(1):119–28. Available from:  
809 <http://www.ncbi.nlm.nih.gov/pubmed/7476573>  
810 27. Trager W, Jensen JB. Human malaria parasites in continuous culture. Science  
811 (80- ). 1976 Aug;193(4254):673–5.  
812 28. Van den Steen PE, Geurts N, Deroost K, Van Aelst I, Verhenne S, Heremans H,  
813 et al. Immunopathology and dexamethasone therapy in a new model for malaria-  
814 associated acute respiratory distress syndrome. Am J Respir Crit Care Med  
815 [Internet]. 2010 May 1 [cited 2011 Nov 1];181(9):957–68. Available from:  
816 <http://www.ncbi.nlm.nih.gov/pubmed/20093644>  
817 29. Shu J, Qiu G, Mohammad Ilyas. Immunohistochemistry (IHC) Image Analysis  
818 Tollbox [Internet]. 2015. Available from: [http://rsb.info.nih.gov/ij/plugins/ihc-](http://rsb.info.nih.gov/ij/plugins/ihc-toolbox/index.html)  
819 [toolbox/index.html](http://rsb.info.nih.gov/ij/plugins/ihc-toolbox/index.html)  
820 30. Aitken EH, Negri EM, Barboza R, Lima MRI, Alvarez JM, Marinho CRF, et al.  
821 Ultrastructure of the lung in a murine model of malaria-associated acute lung  
822 injury/acute respiratory distress syndrome. Malar J [Internet]. 2014;13:230.  
823 Available from:  
824 [http://www.pubmedcentral.nih.gov/articlerender.fcgi?artid=4062769&tool=pmce](http://www.pubmedcentral.nih.gov/articlerender.fcgi?artid=4062769&tool=pmcentrez&rendertype=abstract)  
825 [ntrez&rendertype=abstract](http://www.pubmedcentral.nih.gov/articlerender.fcgi?artid=4062769&tool=pmcentrez&rendertype=abstract)



- 826 31. Pino P, Vouldoukis I, Kolb JP, Mahmoudi N, Desportes-Livage I, Bricaire F, et  
827 al. Plasmodium falciparum--infected erythrocyte adhesion induces caspase  
828 activation and apoptosis in human endothelial cells. *J Infect Dis* [Internet]. 2003  
829 Apr 15;187(8):1283–90. Available from:  
830 <http://www.ncbi.nlm.nih.gov/pubmed/12696008>
- 831 32. De las Salas B, Segura C, Pabón A, Lopes SCP, Costa FTM, Blair S. Adherence  
832 to human lung microvascular endothelial cells (HMVEC-L) of Plasmodium vivax  
833 isolates from Colombia. *Malar J* [Internet]. 2013 Jan [cited 2014 Dec 17];12:347.  
834 Available from:  
835 <http://www.pubmedcentral.nih.gov/articlerender.fcgi?artid=3850517&tool=pmcentrez&rendertype=abstract>
- 837 33. Lagasse HAD, Anidi IU, Craig JM, Limjunyawong N, Poupore AK, Mitzner W,  
838 et al. Recruited monocytes modulate malaria-induced lung injury through CD36-  
839 mediated clearance of sequestered infected erythrocytes. *J Leukoc Biol* [Internet].  
840 2016 May 1;99(5):659–71. Available from:  
841 <http://www.jleukbio.org/cgi/doi/10.1189/jlb.4HI0315-13ORRR>
- 842 34. Maknitikul S, Luplertlop N, Grau GER, Ampawong S. Dysregulation of  
843 pulmonary endothelial protein C receptor and thrombomodulin in severe  
844 falciparum malaria-associated ARDS relevant to hemozoin. *PLoS One* [Internet].  
845 2017;12(7):e0181674. Available from:  
846 <http://dx.plos.org/10.1371/journal.pone.0181674>
- 847 35. Jaramillo M, Godbout M, Olivier M. Hemozoin induces macrophage chemokine  
848 expression through oxidative stress-dependent and -independent mechanisms. *J*  
849 *Immunol* [Internet]. 2005 Jan 1;174(1):475–84. Available from:  
850 <http://www.ncbi.nlm.nih.gov/pubmed/15611273>
- 851 36. Shio MT, Kassa FA, Bellemare MJ, Olivier M. Innate inflammatory response to  
852 the malarial pigment hemozoin. *Microbes Infect*. 2010;12(12–13):889–99.
- 853 37. Coban C, Ishii KJ, Kawai T, Hemmi H, Sato S, Uematsu S, et al. Toll-like  
854 receptor 9 mediates innate immune activation by the malaria pigment hemozoin.  
855 *J Exp Med* [Internet]. 2005 Jan 3 [cited 2013 Mar 6];201(1):19–25. Available  
856 from: <http://www.jem.org/lookup/doi/10.1084/jem.20041836>
- 857 38. Parroche P, Lauw FN, Goutagny N, Latz E, Monks BG, Visintin A, et al. Malaria  
858 hemozoin is immunologically inert but radically enhances innate responses by  
859 presenting malaria DNA to Toll-like receptor 9. *Proc Natl Acad Sci U S A*  
860 [Internet]. 2007 Feb 6;104(6):1919–24. Available from:  
861 <http://www.pubmedcentral.nih.gov/articlerender.fcgi?artid=1794278&tool=pmcentrez&rendertype=abstract>
- 862 39. El-Assaad F, Wheway J, Mitchell AJ, Lou J, Hunt NH, Combes V, et al.  
863 Cytoadherence of plasmodium berghei-infected red blood cells to murine brain  
864 and lung microvascular endothelial cells in vitro. *Infect Immun* [Internet]. 2013  
865 Aug 12 [cited 2013 Aug 20];81(11):3984–91. Available from:  
866 <http://www.ncbi.nlm.nih.gov/pubmed/23940206>
- 867 40. Ockenhouse CF, Tegoshi T, Maeno Y, Benjamin C, Ho M, Kan KE, et al.  
868 Human vascular endothelial cell adhesion receptors for Plasmodium falciparum-  
869 infected erythrocytes: roles for endothelial leukocyte adhesion molecule 1 and  
870 vascular cell adhesion molecule 1. *J Exp Med* [Internet]. 1992 Oct  
871 1;176(4):1183–9. Available from: <http://www.ncbi.nlm.nih.gov/pubmed/1383378>
- 872 41. Rambhatla JS, Turner L, Manning L, Laman M, Davis TME, Beeson JG, et al.  
873 Acquisition of antibodies against endothelial protein c receptor-binding domains  
874 of plasmodium falciparum erythrocyte membrane protein 1 in children with  
875

- 876 severe malaria. *J Infect Dis*. 2019;219(5):808–18.
- 877 42. Shabani E, Opoka RO, Bangirana P, Park GS, Vercellotti GM, Guan W, et al.  
878 The endothelial protein C receptor rs867186-GG genotype is associated with  
879 increased soluble EPCR and could mediate protection against severe malaria. *Sci*  
880 *Rep* [Internet]. 2016;6(April):27084. Available from:  
881 <http://dx.doi.org/10.1038/srep27084>
- 882 43. Meijvis SCA, Hardeman H, Remmelts HHF, Heijligenberg R, Rijkers GT, Van  
883 Velzen-Blad H, et al. Dexamethasone and length of hospital stay in patients with  
884 community-acquired pneumonia: A randomised, double-blind, placebo-  
885 controlled trial. *Lancet* [Internet]. 2011;377(9782):2023–30. Available from:  
886 [http://dx.doi.org/10.1016/S0140-6736\(11\)60607-7](http://dx.doi.org/10.1016/S0140-6736(11)60607-7)
- 887 44. Azoulay É, Canet E, Raffoux E, Lengliné E, Lemiale V, Vincent F, et al.  
888 Dexamethasone in patients with acute lung injury from acute monocytic  
889 leukaemia. *Eur Respir J*. 2012;39(3):648–53.
- 890 45. Warrell DA, Looareesuwan S, Warrell MJ, Kasemsarn P, Intaraprasert R,  
891 Bunnag D, et al. Dexamethasone Proves Deleterious in Cerebral Malaria. *N Engl*  
892 *J Med* [Internet]. 1982 Feb 11;306(6):313–9. Available from:  
893 <http://www.nejm.org/doi/abs/10.1056/NEJM198202113060601>
- 894 46. Hoffman SL, Rustama D, Punjabi NH, Surampaet B, Sanjaya B, Dimpudus AJ,  
895 et al. High-dose dexamethasone in quinine-treated patients with cerebral malaria:  
896 a double-blind, placebo-controlled trial. *J Infect Dis* [Internet]. 1988  
897 Aug;158(2):325–31. Available from:  
898 <http://www.ncbi.nlm.nih.gov/pubmed/3042874>
- 899 47. Pasvol G. The treatment of complicated and severe malaria. *Br Med Bull*.  
900 2005;75–76(1):29–47.
- 901 48. Storm J, Jespersen JS, Seydel KB, Szeszak T, Mbewe M, Chisala N V, et al.  
902 Cerebral malaria is associated with differential cytoadherence to brain endothelial  
903 cells. *EMBO Mol Med*. 2019;11(2):e9164.
- 904 49. Kessler A, Dankwa S, Bernabeu M, Harawa V, Danziger SA, Duffy F, et al.  
905 Linking EPCR-Binding PfEMP1 to Brain Swelling in Pediatric Cerebral Malaria.  
906 *Cell Host Microbe* [Internet]. 2017;22(5):601–614.e5. Available from:  
907 <https://doi.org/10.1016/j.chom.2017.09.009>
- 908 50. Cayrol C, Girard JP. Interleukin-33 (IL-33): A nuclear cytokine from the IL-1  
909 family. *Immunol Rev*. 2018;281(1):154–68.
- 910 51. Ampawong S, Chaisri U, Viriyavejakul P, Prapansilp P, Grau GE, Turner GDH,  
911 et al. A potential role for interleukin-33 and  $\gamma$ -epithelium sodium channel in the  
912 pathogenesis of human malaria associated lung injury. *Malar J*. 2015;14(1):1–15.
- 913 52. Palomo J, Reverchon F, Piotet J, Besnard AG, Couturier-Maillard A, Maillet I, et  
914 al. Critical role of IL-33 receptor ST2 in experimental cerebral malaria  
915 development. *Eur J Immunol*. 2015;45(5):1354–65.
- 916 53. Reverchon F, Mortaud S, Sivoyon M, Maillet I, Laugeray A, Palomo J, et al. IL-  
917 33 receptor ST2 regulates the cognitive impairments associated with  
918 experimental cerebral malaria. *PLoS Pathog*. 2017;13(4):1–25.
- 919 54. Besnard AG, Guabiraba R, Niedbala W, Palomo J, Reverchon F, Shaw TN, et al.  
920 IL-33-Mediated Protection against Experimental Cerebral Malaria Is Linked to  
921 Induction of Type 2 Innate Lymphoid Cells, M2 Macrophages and Regulatory T  
922 Cells. *PLoS Pathog*. 2015;11(2):1–21.
- 923 55. Park WY, Goodman RB, Steinberg KP, Ruzinski JT, Ii FR, Park DR, et al.  
924 Cytokine Balance in the Lungs of Patients with Acute Respiratory Distress  
925 Syndrome. 2001;(17):1896–903.

- 926 56. Takala A, Jousela I, Takkunen O, Kautiainen H, Jansson S-E, Orpana A, et al. A  
927 prospective study of inflammation markers in patients at risk of indirect acute  
928 lung injury. *Shock* [Internet]. 2002;17(4):252–7. Available from:  
929 <http://www.ncbi.nlm.nih.gov/pubmed/11954822>
- 930 57. Wilson MR, Wakabayashi K, Bertok S, Oakley CM, Patel B V., O’Dea KP, et al.  
931 Inhibition of TNF receptor p55 by a domain antibody attenuates the initial phase  
932 of acid-induced lung injury in mice. *Front Immunol*. 2017;8(FEB):1–12.
- 933 58. Wilson MR, Goddard ME, O’Dea KP, Choudhury S, Takata M. Differential roles  
934 of p55 and p75 tumor necrosis factor receptors on stretch-induced pulmonary  
935 edema in mice. *Am J Physiol Cell Mol Physiol* [Internet]. 2007;293(1):L60–8.  
936 Available from: <http://www.physiology.org/doi/10.1152/ajplung.00284.2006>
- 937 59. Proudfoot A, Bayliffe A, O’Kane CM, Wright T, Serone A, Bareille PJ, et al.  
938 Novel anti-tumour necrosis factor receptor-1 (TNFR1) domain antibody prevents  
939 pulmonary inflammation in experimental acute lung injury. *Thorax* [Internet].  
940 2018;1:thoraxjnl-2017-210305. Available from:  
941 <http://thorax.bmj.com/lookup/doi/10.1136/thoraxjnl-2017-210305>
- 942 60. Lin JW, Sodenkamp J, Cunningham D, Deroost K, Tshitenge TC, McLaughlin S,  
943 et al. Signatures of malaria-associated pathology revealed by high-resolution  
944 whole-blood transcriptomics in a rodent model of malaria. *Sci Rep* [Internet].  
945 2017;7(September 2016):1–13. Available from:  
946 <http://dx.doi.org/10.1038/srep41722>

947

## 948 **Figure Captions**

949

950 **Figure 1: ARDS-developing mice have higher levels of pulmonary parasites than**  
951 **HP-developing mice.** The distribution of infected red blood cells (iRBCs) was analyzed  
952 in DBA/2 mice infected with luciferase-expressing *P. berghei* parasite (PbA-luciferase)  
953 on the 7<sup>th</sup> day postinfection (dpi) and analyzed *in vivo* by IVIS imaging (a) after  
954 luciferin injection and (b) after perfusion. (c) The tissues were removed and individually  
955 analyzed for the remaining concentration of iRBCs, one-way ANOVA after perfusion  
956 (\*\*p<0.01; \*\*\*p<0.001). (d) Perfused lungs from ARDS- and HP-developing mice  
957 (classified according to respiratory patterns and parasitemia) were collected on the 7<sup>th</sup>  
958 dpi and analyzed by rRNA gene expression of *P. berghei* ANKA (18S subunit) using  
959 the  $2^{-\Delta\Delta CT}$  method (normalized to HPRT expression). (e) Representative image of a  
960 perfused lung collected from an ARDS-developing mouse on the 7<sup>th</sup> dpi under normal  
961 light. (f) The same lung image under polarized light showing the hemozoin pigments.  
962 (g) Quantification of the hemozoin area in perfused lungs collected on the 7<sup>th</sup> dpi  
963 analyzed by ImageJ (magnification: 400×, scale bar: 20 μm, 10 images for each tissue).  
964 Bars represent the average ± SD (\*p<0.05; \*\*p< 0.01). d: unpaired t-test and g: Mann-  
965 Whitney test. (H) Lung histological analyses showing iRBCs in close contact with  
966 endothelial cells (indicated by arrows) in an infected mouse that died by ARDS  
967 (magnification: 630×, scale bar: 10 μm). HP: hyperparasitemia; ARDS: acute  
968 respiratory distress syndrome. Lu: lung; Sp: spleen; Ki: kidney; Li: liver; Br: brain; He:  
969 heart.

970 **Figure 2: TNF increases *Plasmodium berghei* adherence in the ARDS experimental**  
971 **model.** Serum from ARDS- and HP-developing mice (classified according to  
972 respiratory patterns and parasitemia) was collected on the 7<sup>th</sup> day postinfection (dpi) and  
973 submitted for (a) TNF analysis by ELISA. (b) Primary microvascular lung endothelial  
974 cells (PMLECs) from naïve DBA/2 mice were stimulated with infected red blood cells

975 (iRBCs), and the supernatant was collected for the measurement of TNF concentration  
976 in comparison to that of nonstimulated cells (NS). PMLECs were also stimulated with  
977 TNF (50 ng/ml) for (c) 24, (d) 48 and (e) 72 hours and compared to NS to evaluate the  
978 adhesion of iRBCs to PMLECs under static conditions and (f-h) under flow conditions  
979 (after 24 hours of stimulation with TNF). (i) Representative images of iRBC adhered in  
980 PMLEC in a static condition assay after coincubation with peritoneal macrophages (i-k)  
981 Peritoneal macrophages (M $\phi$ ), collected from noninfected DBA/2 mice, were seeded in  
982 transwell membranes, and then PMLECs were seeded on the bottom of a 24-well plate  
983 with no contact with the M $\phi$ . M $\phi$  were coincubated with iRBCs or red blood cells  
984 (RBCs) for 24 hours (j), and then the supernatant shared by M $\phi$  and PMLECs was  
985 collected to assess TNF release (by ELISA). (k) Subsequently, the PMLECs on the  
986 bottom of the 24-well plate (that had contact with the M $\phi$  supernatant) were incubated  
987 with iRBCs, washed and analyzed for iRBC adhesion. (l) iRBC adherence was assessed  
988 in TNF-stimulated cells, TNF-neutralized cells with antibodies and both together. Bars  
989 represent the average  $\pm$  SEM, Graphics a: one-way ANOVA from two grouped  
990 experiments; B-H: Mann-Whitney test. b: Mann-Whitney test representative of two  
991 independent experiments; c-e: Mann-Whitney test from two grouped experiments; h:  
992 Mann-Whitney test representative of two independent experiments. j: Kruskal-Wallis  
993 test representative of two independent experiments; k: One-way ANOVA, Kruskal-  
994 Wallis test representative of two independent experiments; l: Mann-Whitney test from  
995 two grouped experiments; Bars represent the average  $\pm$  SD (\* $p$ <0.05; \*\* $p$ <0.01;  
996 \*\*\* $p$ <0.001). ARDS: acute respiratory distress syndrome; HP: hyperparasitemia;  
997 Arrows in f, g and i indicates iRBC adhered in PMLEC.

998 **Figure 3: EPCR contributes to *P. berghei* cytoadherence.** Lungs and serum from  
999 ARDS- and HP-developing mice (classified according to respiratory patterns) were  
1000 collected on the 7<sup>th</sup> day postinfection and analyzed by (a) EPCR mRNA expression, (b)  
1001 soluble EPCR (sEPCR) in serum and (c) EPCR protein in lungs. (a) mRNA expression  
1002 was analyzed by  $2^{-\Delta\Delta CT}$  (normalized to noninfected control mice and HPRT gene  
1003 expression), (b) ELISA was quantified in the serum and (c) EPCR protein quantification  
1004 was normalized to  $\beta$ -actin. Primary microvascular endothelial cells (PMLECs) from  
1005 noninfected DBA/2 mice were stimulated with either infected red blood cells (iRBCs)  
1006 or TNF (50  $\mu$ g/ml) for (d) 24, (e) 48 and (f) 72 hours. (g) PMLECs were subjected to  
1007 EPCR knockdown with siRNA, and (h) iRBC adherence in PMLECs was evaluated.  
1008 Graphic a: unpaired t-test from three grouped experiments; b: unpaired t-test  
1009 representative of two independent experiments; c: Mann-Whitney test representative of  
1010 two independent experiments; d: unpaired t-test from two grouped experiments; e-g:  
1011 One-way ANOVA from two grouped experiments and h: One-way ANOVA from two  
1012 grouped experiments. Bars represent the average  $\pm$  SD (\* $p$ <0.05; \*\* $p$ <0.01;  
1013 \*\*\* $p$ <0.001; \*\*\*\* $p$ <0.0001). Each experiment was repeated at least twice (n=4-7  
1014 replicates/group). ARDS: acute respiratory distress syndrome; HP: hyperparasitemia;  
1015 NS: nonstimulated cells; NT: nontransfected cells. Red dashed lines: noninfected mice.

1016 **Figure 4: Dexamethasone reduces TNF and EPCR, protecting mouse lungs and**  
1017 **PMLECs from increased vascular permeability.** DBA/2 mice infected with  
1018 *Plasmodium berghei* ANKA were treated with dexamethasone (80 mg/kg in 200  $\mu$ l),  
1019 and their serum and perfused lungs were collected on the 7<sup>th</sup> day postinfection (dpi) and  
1020 compared to those of infected-untreated mice (received 200  $\mu$ l of 1 $\times$  PBS). (a) The TNF  
1021 concentration was analyzed in the serum (ELISA). (b) EPCR mRNA expression was  
1022 analyzed in the lungs by qRT-PCR with the  $2^{-\Delta\Delta CT}$  method (normalized to noninfected



1023 control mice and HPRT gene expression). (c) The sEPCR concentration was evaluated  
1024 in both sera and (d) bronchoalveolar lavage (BAL). (e) The VEGF concentration was  
1025 also evaluated in BAL of infected mice treated or untreated with dexamethasone. Evans  
1026 Blue (EB) was injected into infected and noninfected (treated or not treated with  
1027 dexamethasone) mice, and (f-g) EB accumulation in the lungs and (h) lung weights  
1028 (after perfusion) were compared between groups. (i-j) Some primary microvascular lung  
1029 endothelial cells (PMLECs) were treated with dexamethasone but others were not, and  
1030 they were subsequently coincubated with either infected red blood cells (iRBCs) or red  
1031 blood cells (RBCs). (i) PMLECs were stained for actin microfilaments (gray), and  
1032 nuclei were stained with Hoechst stain (blue), which showed openings in the  
1033 interendothelial junctions (OIJ) (indicated by yellow arrows). (j) Measurements of the  
1034 OIJ were compared among all groups. (k) The permeability of dexamethasone-treated  
1035 PMLECs was compared using Evans blue in a Transwell assay. (l) The VEGF  
1036 concentration was measured in these groups. Infected+Dexa: *P. berghei* ANKA-  
1037 infected and dexamethasone-treated mice. Graphics a, d, g and h: Mann-Whitney test  
1038 representative of two independent experiments; b: Unpaired t-test from two grouped  
1039 experiments; c: Mann-Whitney test from two grouped experiments; e: Unpaired t-test  
1040 representative of two independent experiments; i: Kruskal-Wallis test from three  
1041 grouped experiments; k: Unpaired t-test from three grouped experiments and L: One-  
1042 way ANOVA representative of two independent experiments. Bars represent the  
1043 average  $\pm$  SD (\* $p < 0.05$ ; \*\* $p < 0.01$ ; \*\*\*\* $p < 0.0001$ ). Red dashed lines: noninfected mice.

1044 **Figure 5: Dexamethasone protects mice from ARDS but not from malaria**  
1045 **infection.** DBA/2 mice infected with *Plasmodium berghei* ANKA were treated with  
1046 dexamethasone (80 mg/kg in 200  $\mu$ l) and compared to infected-untreated mice (received  
1047 200  $\mu$ l of 1 $\times$  PBS) on the 7<sup>th</sup> day post-infection for the following respiratory parameters:  
1048 (a) respiratory frequency, (b) tidal volume and (c) enhanced pause (Penh) analyzed in  
1049 whole body plethysmography chambers (Buxco). (d) Parasitemia (%) in the peripheral  
1050 blood and (e) the survival curves were compared between groups. Representative image  
1051 of histological analysis of lungs from (f) an infected mouse and (g) an infected+Dexa  
1052 mouse (Scale bar: 50  $\mu$ m). Infected+Dexa: mice infected with *P. berghei* ANKA and  
1053 treated with dexamethasone. Graphics a-d: Unpaired t test, representative data from two  
1054 independent experiments. Bars represent the average  $\pm$  SD. (\* $p < 0.05$ ; \*\*  $p < 0.01$ ). Red  
1055 dashed lines: noninfected mice.

1056 **Figure 6: Schematic representation of ARDS development involving adhesion of**  
1057 **iRBCs to EPCR.** *Plasmodium berghei* ANKA-infected red blood cells (iRBCs) induce  
1058 TNF release by endothelial and inflammatory cells. Stimulus with TNF upregulates  
1059 EPCR expression in lung endothelial cells, which increases the adhesion of iRBCs in  
1060 these cells through the EPCR pathway. The adhesion of iRBCs to lung endothelial cells  
1061 leads to an increase in gap formation in the interendothelial junction, an increase in  
1062 vascular permeability with infiltration of inflammatory cells and red blood cells and  
1063 edema formation. Activated alveolar macrophages also produce TNF, which contributes  
1064 to the activation of endothelial cells, recruitment of neutrophils and alveolar damage.  
1065 Treatment with dexamethasone decreases inflammatory cytokine release, including  
1066 TNF release, and consequently downregulates EPCR expression in lung endothelial  
1067 cells; dexamethasone also decreases VEGF released by endothelial cells, protecting  
1068 mice from gap formations, vascular permeability, inflammatory cell infiltration and  
1069 alveolar damage.



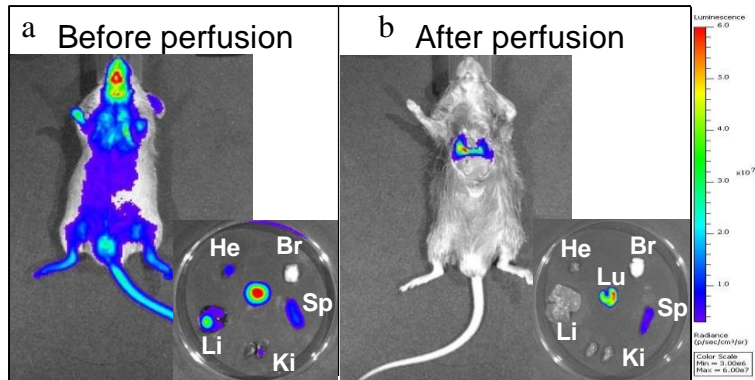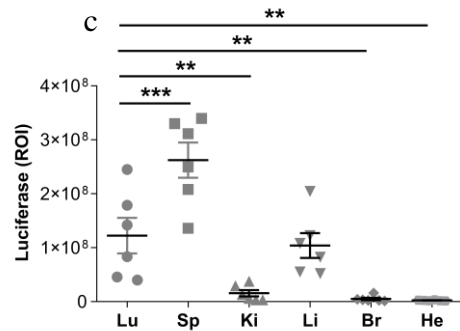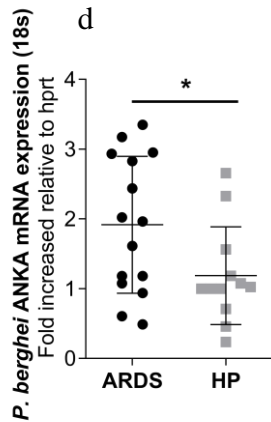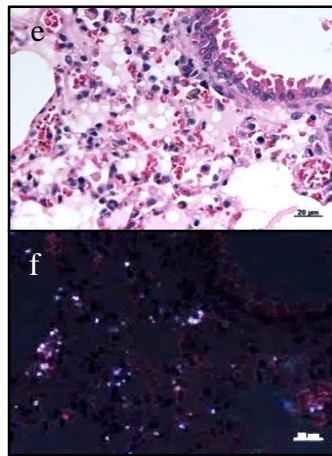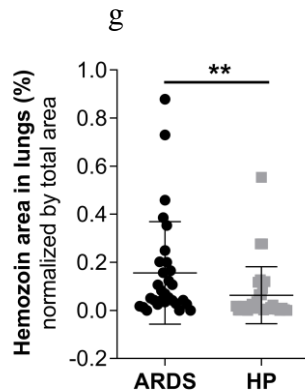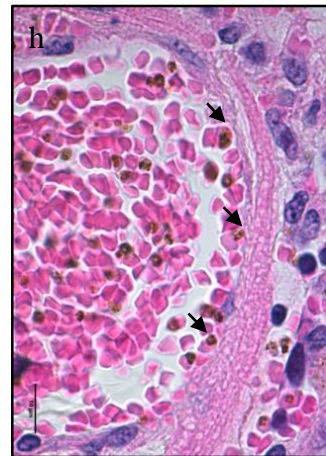

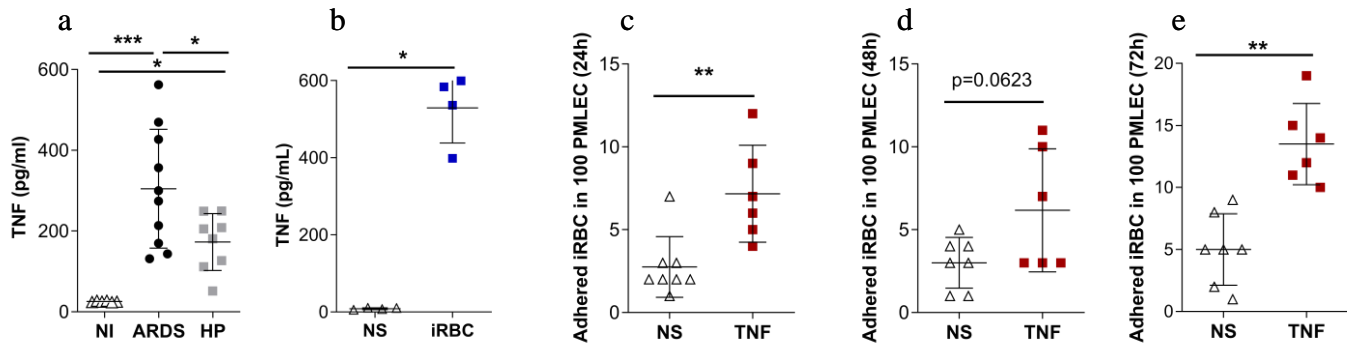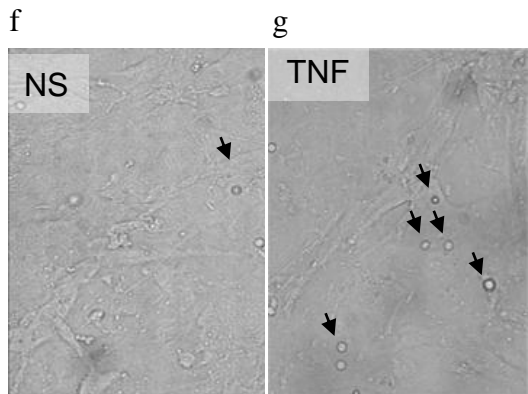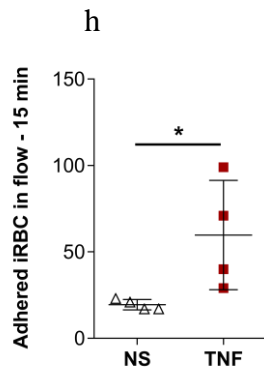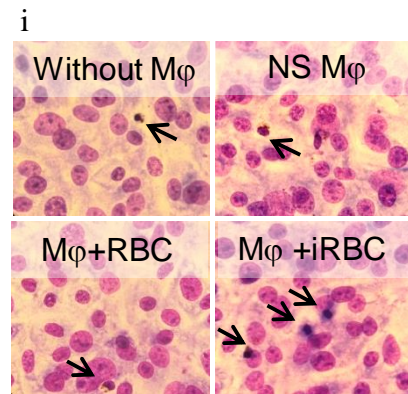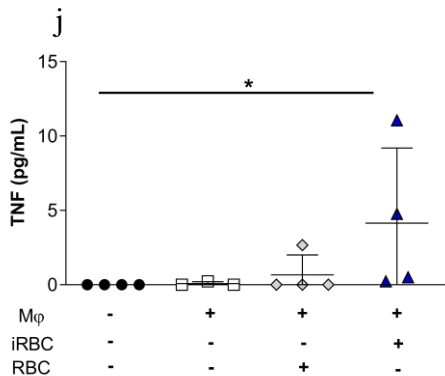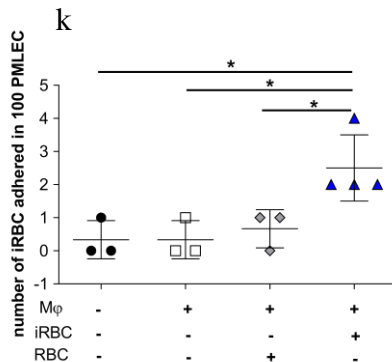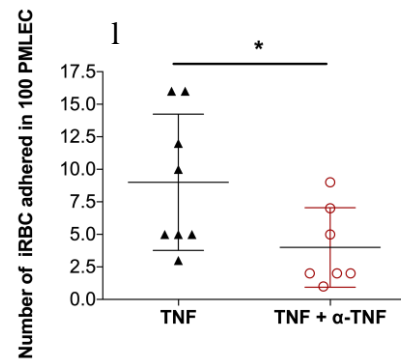

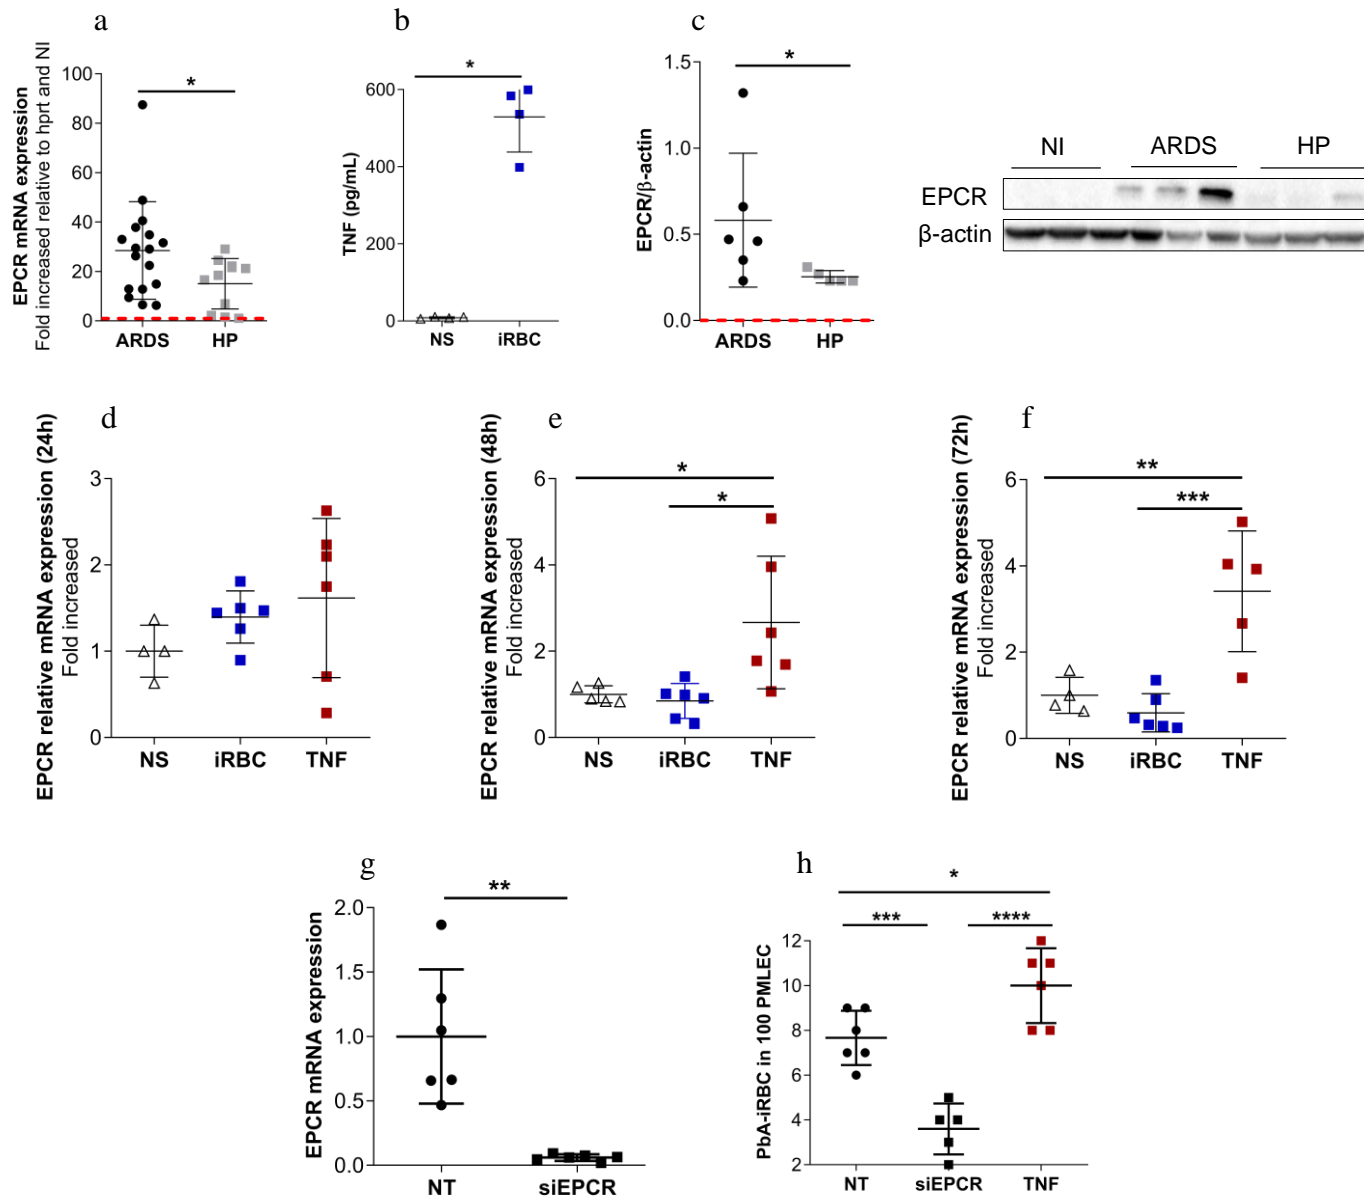

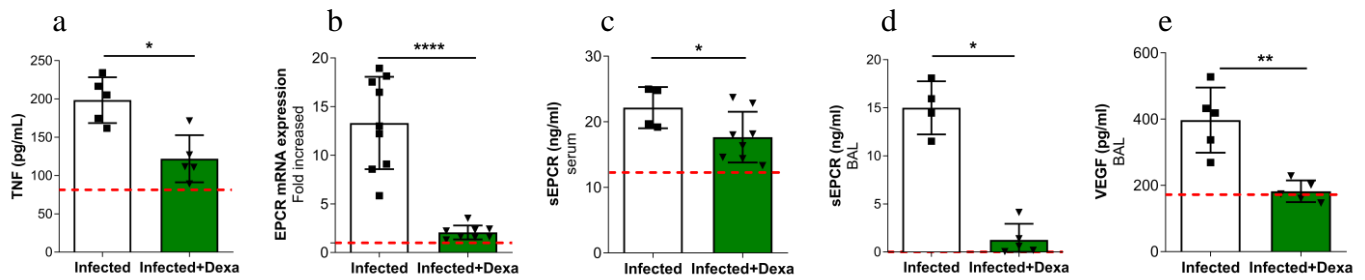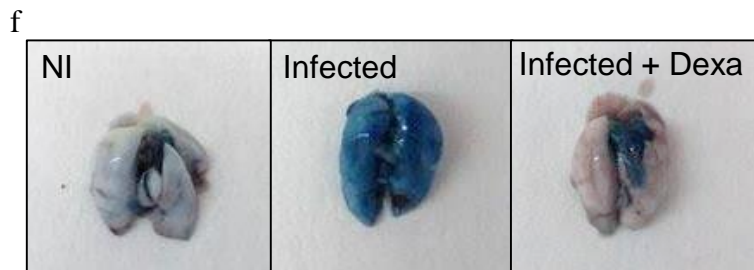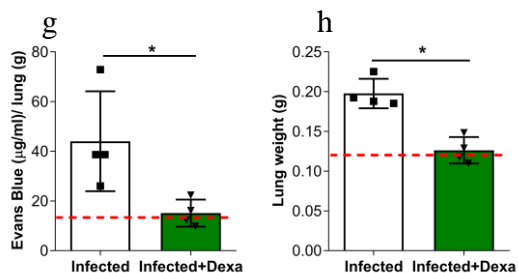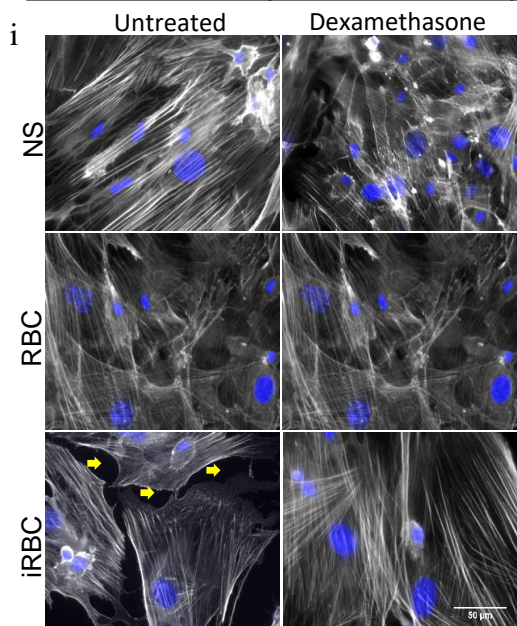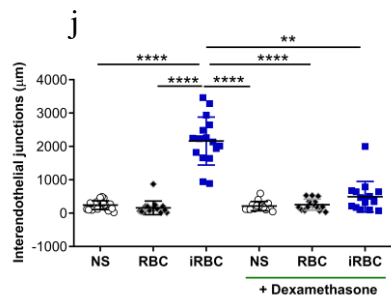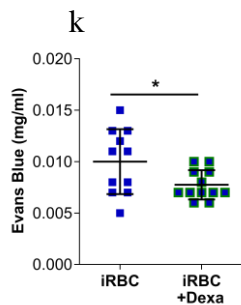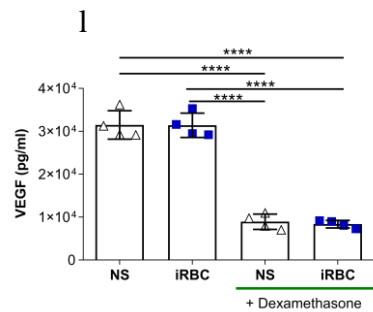



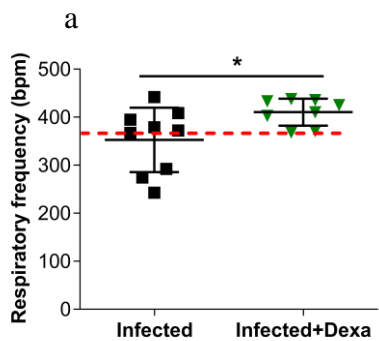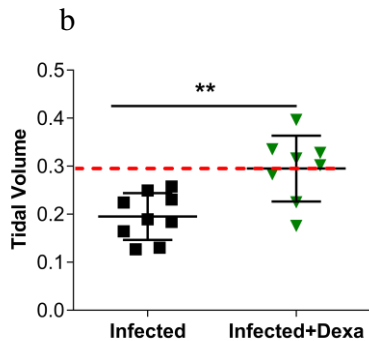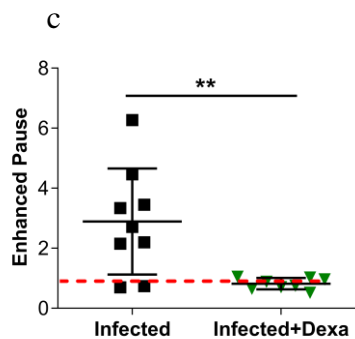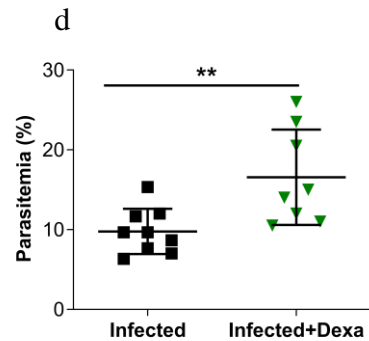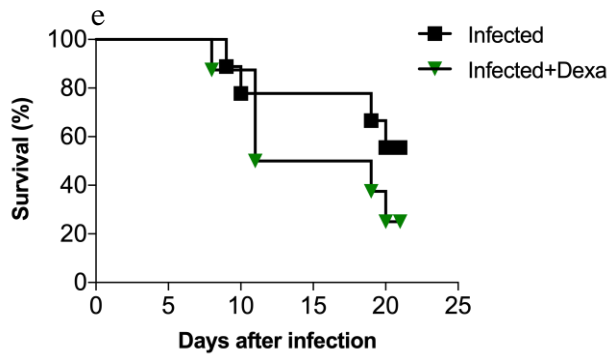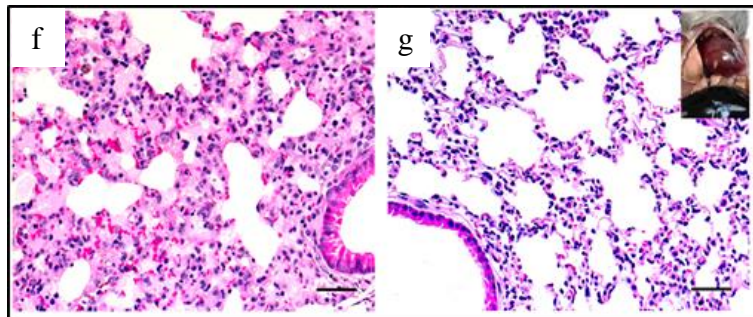

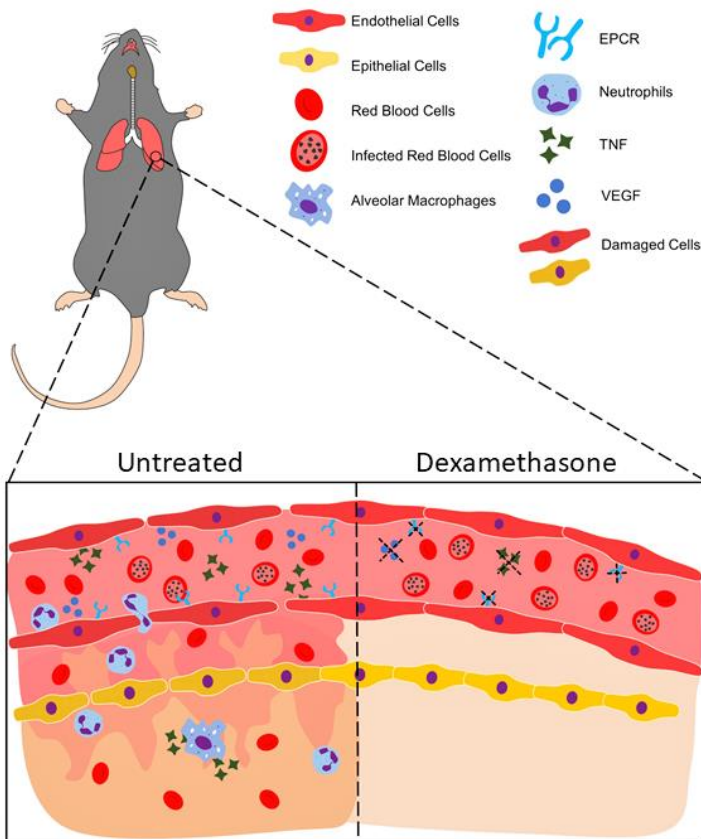

Source: https://www.biorxiv.org/content/10.1101/348318v2.full.pdf
